# Supplementary material
Source: HighWire-hosted journal article supplement (https://thorax.bmj.com/highwire/filestream/209355/field_highwire_adjunct_files/0/thorax-2023-220249supp001_data_supplement.pdf)
Supplement: thorax-2023-220249supp001_data_supplement.pdf [file thorax-2023-220249supp001_data_supplement.pdf]

---

# Appendix

---

## Contents

|                                                                                                                                                          |    |
|----------------------------------------------------------------------------------------------------------------------------------------------------------|----|
| Appendix Table 1. Centre Characteristics for Each Dataset in the Individual Patient Database.....                                                        | 2  |
| Appendix Table 2. Completeness of Information and Other Quality Features of Each Dataset Included in the Meta-Analysis .....                             | 4  |
| Appendix Table 3. Patient Support and Hospitalization Protocols in Each Dataset in the Individual Patient Database.....                                  | 5  |
| Appendix Table 4. Outcome Definitions Used for Each Dataset in the Individual Patient Database .....                                                     | 7  |
| Appendix Table 5. Proportion of Included Patients with Missing Data for Variables Used in Statistical Analysis .....                                     | 9  |
| Appendix Table 6. Characteristics of Included vs. Excluded Participants .....                                                                            | 10 |
| Appendix Table 7. Included Participants by Country or Region of Treatment .....                                                                          | 11 |
| Appendix Table 8. Multivariable Estimates and Stratified Analyses Assessing Effect Modification of AFB and CXR Cavitation on Mortality .....             | 12 |
| Appendix Table 9. Multivariable Estimates and Stratified Analyses Assessing Effect Modification of AFB and CXR Cavitation on Failure or Recurrence ..... | 13 |
| Appendix Table 10. Characteristics of Participants Included vs. Excluded in the “Strict Complete Case Analysis”.....                                     | 14 |
| Appendix Table 11. Characteristics of Participants Included vs. Excluded in the “Complete Case Except Drug Susceptibility Testing Analysis” .....        | 15 |
| Appendix Table 12. Multivariable Estimates of Primary Outcomes for All Analyses .....                                                                    | 16 |
| Appendix Table 13. Characteristics of Participants Included vs. Excluded in Culture Conversion Analysis .....                                            | 17 |
| References .....                                                                                                                                         | 18 |

## Appendix Table 1. Centre Characteristics for Each Dataset in the Individual Patient Database

| No | Contact person (ref)             | Study Location                                                                                                                                   | Years of Treatment Initiation | Catchment area                  | Type of Drug Regimen            | Included (I) or Excluded (E) in Present Analysis |
|----|----------------------------------|--------------------------------------------------------------------------------------------------------------------------------------------------|-------------------------------|---------------------------------|---------------------------------|--------------------------------------------------|
| 1  | Ahmad <sup>1</sup>               | Peshawar, Pakistan                                                                                                                               | 2012-2013                     | Hospital                        | Standardized and individualized | I                                                |
| 2  | Ahuja <sup>2</sup>               | New York City, USA                                                                                                                               | 2000-2006                     | State                           | Individualized                  | I                                                |
| 3  | Anderson <sup>3</sup>            | UK                                                                                                                                               | 2004-2007                     | Country                         | Individualized                  | E                                                |
| 4  | Bang <sup>4</sup>                | Denmark                                                                                                                                          | 1992-2007                     | Country                         | Individualized                  | I                                                |
| 5  | Barkane <sup>5</sup>             | Riga, Latvia                                                                                                                                     | 2014                          | Hospital                        | Individualized                  | I                                                |
| 6  | Barry (Korea) <sup>6,7</sup>     | Seoul and Changwon, South Korea                                                                                                                  | 2008-2011                     | Hospital                        | Individualized                  | I                                                |
| 7  | Barry/Flood (Calif) <sup>8</sup> | California, USA                                                                                                                                  | 2009-2015                     | State                           | Individualized                  | I                                                |
| 8  | Bonnet <sup>9</sup>              | Abkhazia                                                                                                                                         | 2001-2014                     | Region                          | Individualized                  | I                                                |
| 9  | Brode <sup>10</sup>              | Toronto, Canada                                                                                                                                  | 2010-2014                     | Hospital                        | Individualized                  | I                                                |
| 10 | Brust <sup>11</sup>              | KwaZulu-Natal, South Africa                                                                                                                      | 2000-2003                     | Hospital                        | Standardized                    | E                                                |
| 11 | Cegielski <sup>12,13</sup>       | Multination (Estonia, Latvia, Philippines, Peru, Russia, South Africa, South Korea, Taiwan, Thailand)                                            | 2005-2010                     | Clinical centres (multi-center) | Individualized                  | I                                                |
| 12 | Chan (Denver) <sup>14</sup>      | Denver, USA                                                                                                                                      | 1999-2015                     | Hospital                        | Individualized                  | E                                                |
| 13 | Dheda <sup>15-17</sup>           | Cape Town, Upington and Johannesburg in South Africa                                                                                             | 2002-2008                     | Clinic (multi-center)           | Individualized                  | E                                                |
| 14 | Fox <sup>18</sup>                | Sydney, Australia                                                                                                                                | 2000-2018                     | Clinic (multi-center)           | Individualized                  | I                                                |
| 15 | Gegia <sup>19</sup>              | Georgia                                                                                                                                          | 2008                          | Country                         | Standardized                    | E                                                |
| 16 | Guglielmetti <sup>20,21</sup>    | Paris, France                                                                                                                                    | 2010-2013                     | Hospital                        | Individualized                  | I                                                |
| 17 | Guglielmetti <sup>22</sup>       | Paris, France                                                                                                                                    | 2014-2015                     | Hospital                        | Individualized                  | I                                                |
| 18 | Hughes <sup>23</sup>             | Khayelitsha, South Africa                                                                                                                        | 2011-2015                     | Community                       | Individualized                  | E                                                |
| 19 | Isaakidis <sup>23,24</sup>       | Mumbai, India                                                                                                                                    | 2006-2016                     | Clinic                          | Individualized                  | E                                                |
| 20 | Jarlsberg <sup>25</sup>          | San Francisco, USA                                                                                                                               | 2001-2015                     | City                            | Individualized                  | I                                                |
| 21 | Kempker <sup>26</sup>            | Tbilisi, Georgia                                                                                                                                 | 2009-2012                     | Hospital                        | Individualized                  | I                                                |
| 22 | Koenig <sup>27</sup>             | Port-au-Prince, Haiti                                                                                                                            | 2008-2015                     | Clinic (multi-center)           | Standardized and individualized | E                                                |
| 23 | Koh <sup>28,29</sup>             | Seoul, South Korea                                                                                                                               | 2005-2011                     | Hospital                        | Individualized                  | I                                                |
| 24 | Kuksa <sup>30</sup>              | Riga, Latvia                                                                                                                                     | 2014                          | Hospital                        | Individualized                  | I                                                |
| 25 | Kvasnovsky <sup>31,32</sup>      | Eastern Cape and KwaZulu-Natal, South Africa                                                                                                     | 2006-2008                     | Clinic (multi-center)           | Individualized                  | I                                                |
| 26 | Lange <sup>33</sup>              | Germany                                                                                                                                          | 2004-2006                     | Hospital (multi-center)         | Individualized                  | I                                                |
| 27 | Laniado-Laborin <sup>34</sup>    | Baja California, Mexico                                                                                                                          | 2006-2010                     | Clinic (multi-center)           | Individualized                  | E                                                |
| 28 | Leung <sup>35,36</sup>           | Hong Kong                                                                                                                                        | 1996-2009                     | Territory                       | Individualized                  | I                                                |
| 29 | Marks <sup>37</sup>              | California, New York City, and Texas in USA                                                                                                      | 2005-2007                     | State (multi-center)            | Individualized                  | I                                                |
| 30 | Migliori <sup>38,39</sup>        | Multination (Italy, Belgium, Ecuador, Belarus, Greece, Peru, Slovakia, Netherlands, UK)                                                          | 2003-2015                     | Hospital (multi-center)         | Individualized                  | I                                                |
| 31 | Migliori (BDQ) <sup>40</sup>     | Multination (Argentina, Australia, Belarus, Belgium, Greece, India, Italy, Netherlands, Peru, Portugal, Russia, South Africa, Spain, Sweden, UK) | 2010-2014                     | Hospital (multi-center)         | Individualized                  | I                                                |
| 32 | Milanov <sup>41</sup>            | Gabrovo, Bulgaria                                                                                                                                | 2009-2010                     | Hospital                        | Individualized                  | E                                                |
| 33 | Ndjeka <sup>42</sup>             | South Africa                                                                                                                                     | 2013-2015                     | Hospital                        | Individualized                  | E                                                |
| 34 | Ndjeka <sup>43</sup>             | South Africa                                                                                                                                     | 2013-2014                     | State                           | Individualized                  | E                                                |

| No | Contact person (ref)            | Study Location                                                                                    | Years of Treatment Initiation | Catchment area            | Type of Drug Regimen            | Included (I) or Excluded (E) in Present Analysis |
|----|---------------------------------|---------------------------------------------------------------------------------------------------|-------------------------------|---------------------------|---------------------------------|--------------------------------------------------|
| 35 | O'Donnell <sup>44</sup>         | KwaZulu-Natal, South Africa                                                                       | 2006-2010                     | Hospital                  | Individualized                  | E                                                |
| 36 | Palmero <sup>45</sup>           | Buenos Aires, Argentina                                                                           | 2012-2013                     | Hospital                  | Individualized                  | E                                                |
| 37 | Podewils <sup>46</sup>          | Makati, Phillipine                                                                                | 1999-2006                     | Clinic                    | Individualized                  | E                                                |
| 38 | Riekstina/Leimane <sup>47</sup> | Riga, Latvia                                                                                      | 2012-2013                     | Country                   | Individualized                  | I                                                |
| 39 | Rodrigues <sup>48</sup>         | Sao Paulo, Brazil                                                                                 | 2014-2016                     | State                     | Standardized and individualized | I                                                |
| 40 | Seo <sup>49</sup>               | South Korea                                                                                       | 2012-2016                     | Hospital                  | Individualized                  | I                                                |
| 41 | Seung <sup>50</sup>             | North Korea                                                                                       | 2012                          | Sanatorium (multi-center) | Standardized                    | E                                                |
| 42 | Shim <sup>29,51</sup>           | Seoul, South Korea                                                                                | 2006-2012                     | Hospital                  | Individualized                  | I                                                |
| 43 | Singla <sup>52</sup>            | Delhi, India                                                                                      | 2006-2011                     | Hospital                  | Individualized                  | I                                                |
| 44 | Skrahina <sup>53</sup>          | Minsk, Belarus                                                                                    | 2015                          | Hospital                  | Standardized and individualized | I                                                |
| 45 | Smith <sup>54</sup>             | Arkhangelsk Oblast, Russia                                                                        | 2005-2010                     | Oblast (multi-center)     | Individualized                  | I                                                |
| 46 | TMC207-C208 <sup>55,56</sup>    | Multination (Brazil, India, Latvia, Peru, Philippines, Russia, South Africa, Thailand)            | 2008-2009                     | Hospital (multi-center)   | Individualized                  | I                                                |
| 47 | TMC207-C209 <sup>57</sup>       | Multination (China, South Korea, Philippines, Thailand, Estonia, Latvia, Russia, Turkey, Ukraine) | 2009-2010                     | Hospital (multi-center)   | Individualized                  | I                                                |
| 48 | Udwadia <sup>58</sup>           | Mumbai, India                                                                                     | 2004-2007                     | Hospital                  | Individualized                  | I                                                |
| 49 | van der Werf <sup>59</sup>      | The Netherlands                                                                                   | 2000-2009                     | Country                   | Individualized                  | E                                                |
| 50 | Vasilyeva <sup>60</sup>         | Russia                                                                                            | 2016                          | State                     | Individualized                  | I                                                |
| 51 | Viiklepp <sup>61</sup>          | Estonia                                                                                           | 2008-2013                     | Country                   | Individualized                  | I                                                |
| 52 | Yim/Kwak <sup>62</sup>          | Seoul, South Korea                                                                                | 2006-2010                     | Hospital                  | Individualized                  | I                                                |

**Appendix Table 2. Completeness of Information and Other Quality Features of Each Dataset Included in the Meta-Analysis**

| No | Contact person (ref)             | Sampling method | Info on second-line injectable sensitivity | Info on fluoroquinolone | Participation rate | Lost to follow-up rate | Outcome definition   | Info on age | Info on HIV | Info on TB treatment history | Quality  |
|----|----------------------------------|-----------------|--------------------------------------------|-------------------------|--------------------|------------------------|----------------------|-------------|-------------|------------------------------|----------|
| 1  | Ahmad <sup>1</sup>               | Census          | 100.0%                                     | 100.0%                  | 96.8%              | 1.7%                   | Laserson             | 100.0%      | 100.0%      | 100.0%                       | High     |
| 2  | Ahuja <sup>2</sup>               | Random          | 92.4%                                      | 92.4%                   | 100.0%             | 19.0%                  | Laserson             | 100.0%      | 80.0%       | 100.0%                       | High     |
| 3  | Anderson <sup>3</sup>            | Census          | 100.0%                                     | 100.0%                  | 100.0%             | 12.4%                  | Neither Laserson WHO | 100.0%      | 100.0%      | 90.5%                        | High     |
| 4  | Bang <sup>4</sup>                | Census          | 96.6%                                      | 93.1%                   | 96.7%              | 17.2%                  | Laserson             | 100.0%      | 100.0%      | 100.0%                       | High     |
| 5  | Barkane <sup>5</sup>             | Census          | 100%                                       | 100%                    | 100%               | 15.6%                  | Laserson             | 100%        | 100%        | 100%                         | High     |
| 6  | Barry (Korea) <sup>6,7</sup>     | RCT             | 100.0%                                     | 100.0%                  | 92.7%              | 10.5%                  | Laserson             | 100.0%      | 100.0%      | 100.0%                       | High     |
| 7  | Barry/Flood (Calif) <sup>8</sup> | Unclear         | 98.4%                                      | 95.2%                   | 100.0%             | 4.8%                   | WHO 2013             | 98.4%       | 100.0%      | 100.0%                       | Moderate |
| 8  | Bonnet <sup>9</sup>              | Census          | 93.3%                                      | 93.3%                   | 100.0%             | 41.3%                  | Laserson             | 100.0%      | 11.5%       | 98.6%                        | High     |
| 9  | Brode <sup>10</sup>              | Census          | 100.0%                                     | 100.0%                  | 100.0%             | 0.0%                   | Laserson             | 100.0%      | 100.0%      | 100.0%                       | High     |
| 10 | Brust <sup>11</sup>              | Census          | 100.0%                                     | 100.0%                  | 100.0%             | 24.1%                  | Laserson             | 99.3%       | 57.8%       | 98.5%                        | Moderate |
| 11 | Cegielski <sup>12,13</sup>       | Census          | 92.8%                                      | 92.2%                   | 60.1%              | 19.8%                  | Laserson             | 100.0%      | 68.3%       | 98.2%                        | High     |
| 12 | Chan (Denver) <sup>14</sup>      | Census          | 100.0%                                     | 100.0%                  | 100.0%             | 26.7%                  | Laserson             | 100.0%      | 80.0%       | 100.0%                       | High     |
| 13 | Dheda <sup>15-17</sup>           | Census          | 100.0%                                     | 100.0%                  | 61.5%              | 4.7%                   | Laserson             | 99.1%       | 100.0%      | 93.5%                        | High     |
| 14 | Fox <sup>18</sup>                | Census          | 93.1%                                      | 96.6%                   | 100%               | 3.4%                   | WHO 2013             | 100%        | 100%        | 100%                         | High     |
| 15 | Gegia <sup>19</sup>              | Census          | 100.0%                                     | 100.0%                  | 100.0%             | 21.8%                  | Laserson             | 100.0%      | 72.9%       | 100.0%                       | High     |
| 16 | Guglielmetti <sup>20,21</sup>    | Census          | 100.0%                                     | 100.0%                  | 100.0%             | 11.1%                  | WHO 2013             | 100.0%      | 100.0%      | 100.0%                       | High     |
| 17 | Guglielmetti <sup>22</sup>       | Census          | 100.0%                                     | 100.0%                  | 100.0%             | 10%                    | WHO 2013             | 100.0%      | 100.0%      | 90.0%                        | High     |
| 18 | Hughes <sup>23</sup>             | Census          | 94.9%                                      | 94.9%                   | 100.0%             | 25.4%                  | Laserson             | 100.0%      | 100.0%      | 100.0%                       | High     |
| 19 | Isaakidis <sup>23,24</sup>       | Census          | 96.7%                                      | 95.4%                   | 100.0%             | 11.8%                  | Laserson             | 100.0%      | 100.0%      | 98.0%                        | High     |
| 20 | Jarlsberg <sup>25</sup>          | Census          | 96.4%                                      | 96.4%                   | 100.0%             | 3.6%                   | Laserson             | 100.0%      | 92.9%       | 100.0%                       | High     |
| 21 | Kempker <sup>26</sup>            | Census          | 100.0%                                     | 100.0%                  | 94.9%              | 32.7%                  | Laserson             | 100.0%      | 94.7%       | 100.0%                       | High     |
| 22 | Koenig <sup>27</sup>             | Census          | 96.3%                                      | 93.3%                   | 100.0%             | 6.1%                   | Laserson             | 99.4%       | 100.0%      | 100.0%                       | High     |
| 23 | Koh <sup>28,29</sup>             | Census          | 100.0%                                     | 100.0%                  | 100.0%             | 13.4%                  | WHO 2013             | 100.0%      | 100.0%      | 100.0%                       | High     |
| 24 | Kuksa <sup>30</sup>              | Census          | 100%                                       | 100%                    | 100%               | 15%                    | Laserson             | 100%        | 100%        | 100%                         | High     |
| 25 | Kvasnovsky <sup>31,32</sup>      | Census          | 100.0%                                     | 100.0%                  | 100.0%             | 11.5%                  | Laserson             | 100.0%      | 96.9%       | 100.0%                       | High     |
| 26 | Lange <sup>33</sup>              | Census          | 94.0%                                      | 96.7%                   | 100.0%             | 20.1%                  | Laserson             | 100.0%      | 99.5%       | 98.4%                        | High     |
| 27 | Laniado-Laborin <sup>34</sup>    | Census          | 100.0%                                     | 100.0%                  | 100.0%             | 13.5%                  | Laserson             | 100.0%      | 100.0%      | 100.0%                       | High     |
| 28 | Leung <sup>35,36</sup>           | Census          | 100.0%                                     | 100.0%                  | 100.0%             | 19.9%                  | Laserson             | 100.0%      | 100.0%      | 100.0%                       | High     |
| 29 | Marks <sup>37</sup>              | Random          | 92.3%                                      | 91.5%                   | 100.0%             | 12.3%                  | Neither Laserson WHO | 100.0%      | 85.4%       | 100.0%                       | High     |
| 30 | Migliori <sup>38,39</sup>        | Census          | 96.6%                                      | 96.6%                   | Unclear            | 10.9%                  | WHO 2013             | 100.0%      | 98.1%       | 99.3%                        | High     |
| 31 | Migliori (BDQ) <sup>40</sup>     | Census          | 97.0%                                      | 100.0%                  | Unclear            | 3.7%                   | WHO 2013             | 100.0%      | 99.3%       | 100.0%                       | High     |
| 32 | Milanov <sup>41</sup>            | Census          | 94.0%                                      | 94.0%                   | 100.0%             | 2.0%                   | Laserson             | 100.0%      | 100.0%      | 100.0%                       | High     |
| 33 | Ndjeka <sup>42</sup>             | Unclear         | 78.2%                                      | 81.2%                   | Unclear            | 21.1%                  | Laserson             | 100.0%      | 95.5%       | 0.0%                         | Low      |
| 34 | Ndjeka <sup>43</sup>             | Census          | 100.0%                                     | 100.0%                  | 100.0%             | 18.5%                  | Laserson WHO         | 100.0%      | 100.0%      | 100.0%                       | Low      |
| 35 | O'Donnell <sup>44</sup>          | Census          | 100.0%                                     | 100.0%                  | 100.0%             | 13.2%                  | Laserson             | 100.0%      | 93.9%       | 93.9%                        | High     |
| 36 | Palmero <sup>45</sup>            | Census          | 100.0%                                     | 100.0%                  | 100.0%             | 22.2%                  | WHO 2013             | 100.0%      | 100.0%      | 100.0%                       | High     |
| 37 | Podewils <sup>46</sup>           | Census          | 91.0%                                      | 91.2%                   | 100.0%             | 15.2%                  | Laserson             | 100.0%      | 55.6%       | 100.0%                       | High     |
| 38 | Riekstina/Leimane <sup>47</sup>  | Census          | 100.0%                                     | 100.0%                  | 100.0%             | 14.7%                  | Laserson             | 100.0%      | 94.0%       | 100.0%                       | High     |
| 39 | Rodrigues <sup>48</sup>          | Census          | 87.0%                                      | 85.0%                   | 100.0%             | 10.0%                  | Laserson             | 100.0%      | 98.0%       | 100.0%                       | High     |
| 40 | Seo <sup>49</sup>                | Census          | 100.0%                                     | 100.0%                  | 100.0%             | 16.0%                  | Laserson             | 100.0%      | 100.0%      | 100.0%                       | High     |
| 41 | Seung <sup>50</sup>              | Census          | 80.2%                                      | 80.2%                   | 100.0%             | 1.4%                   | Unclear              | 100.0%      | 0%          | 88.7%                        | High     |
| 42 | Shim <sup>29,51</sup>            | Census          | 100.0%                                     | 100.0%                  | 86.4%              | 8.2%                   | WHO 2013             | 100.0%      | 40%         | 100.0%                       | High     |
| 43 | Singla <sup>52</sup>             | Census          | 100.0%                                     | 100.0%                  | 100.0%             | 13.8%                  | Laserson             | 100.0%      | 100.0%      | 100.0%                       | High     |
| 44 | Skrahina <sup>53</sup>           | Census          | 100.0%                                     | 100.0%                  | 100.0%             | 1.0%                   | WHO 2013             | 100.0%      | 99.0%       | 100.0%                       | High     |
| 45 | Smith <sup>54</sup>              | Census          | 100.0%                                     | 100.0%                  | 100.0%             | 21.5%                  | Laserson             | 100.0%      | 100.0%      | 98.5%                        | High     |
| 46 | TMC207-C208 <sup>55,56</sup>     | RCT             | 84.8%                                      | 84.8%                   | 82.5%              | 28.8%                  | Laserson             | 100.0%      | 100.0%      | 100.0%                       | High     |
| 47 | TMC207-C209 <sup>57</sup>        | Census          | 76.1%                                      | 76.1%                   | 93.1%              | 15.2%                  | Laserson             | 100.0%      | 96.5%       | 100.0%                       | Moderate |
| 48 | Udwadia <sup>58</sup>            | Census          | 100.0%                                     | 100.0%                  | 100.0%             | 27.8%                  | Laserson             | 100.0%      | 44.4%       | 100.0%                       | High     |
| 49 | van der Werf <sup>59</sup>       | Census          | 100.0%                                     | 98.2%                   | 100.0%             | 13.4%                  | Laserson             | 100.0%      | 92.0%       | 96.4%                        | High     |
| 50 | Vasilyeva <sup>60</sup>          | Census          | 94.4%                                      | 94.4%                   | 100%               | 16%                    | WHO 2013             | 100%        | 100%        | 100%                         | High     |
| 51 | Viiklepp <sup>61</sup>           | Census          | 100.0%                                     | 100.0%                  | 100.0%             | 11.7%                  | Laserson             | 100.0%      | 99.7%       | 100.0%                       | High     |
| 52 | Yim/Kwak <sup>62</sup>           | Census          | 100.0%                                     | 100.0%                  | 100.0%             | 4.9%                   | WHO 2013             | 100.0%      | 100.0%      | 100.0%                       | High     |

Quality Assessment Reference: Lancet 2018; 392: 821–34.

**Appendix Table 3. Patient Support and Hospitalization Protocols in Each Dataset in the Individual Patient Database**

| No | Contact person (ref)             | Hospitalization |                                                                                                                                                                                | Directly observed therapy |                                                    |                                             |                                                               |
|----|----------------------------------|-----------------|--------------------------------------------------------------------------------------------------------------------------------------------------------------------------------|---------------------------|----------------------------------------------------|---------------------------------------------|---------------------------------------------------------------|
|    |                                  | Routine? Yes/No | Duration of Hospitalization                                                                                                                                                    | Yes/No                    | Where: CB=Community based/HF=Health facility based | Who: Family/Friend, HCW=Health Care Workers | % on directly observed therapy during ambulatory TB treatment |
| 1  | Ahmad <sup>1</sup>               | No              | All patients were treated on an ambulatory basis                                                                                                                               | Yes                       | HF                                                 | HCW                                         | U                                                             |
| 2  | Ahuja <sup>2</sup>               | Yes             | Aim to get people home as soon as possible                                                                                                                                     | Yes                       | CB, HF                                             | HCW                                         | U                                                             |
| 3  | Anderson <sup>3</sup>            | No              | If infectious and facilities for isolation not available at home, or for clinical indications.                                                                                 | Yes, but not all          | HF                                                 | HCW                                         | 40%                                                           |
| 4  | Bang <sup>4</sup>                | Yes             | NA                                                                                                                                                                             | Yes                       | CB, HF                                             | Family/Friend, HCW                          | N/A                                                           |
| 5  | Barkane <sup>5</sup>             | No              | Till Ss conversion to negative                                                                                                                                                 | Yes                       | HF                                                 | HCW                                         | U                                                             |
| 6  | Barry (Korea) <sup>6,7</sup>     | Yes             | Hospitalization is required at least 2 weeks.                                                                                                                                  | Yes                       | U                                                  | U                                           | about 50%                                                     |
| 7  | Barry/Flood (Calif) <sup>8</sup> | No              | N/A                                                                                                                                                                            | Yes                       | CB, HF                                             | HCW                                         | >95%                                                          |
| 8  | Bonnet <sup>9</sup>              | Yes             | The entire intensive phase                                                                                                                                                     | Yes                       | CB                                                 | HCW                                         | >80%                                                          |
| 9  | Brode <sup>10</sup>              | Yes             | Until culture conversion                                                                                                                                                       | Yes                       | CB                                                 | HCW                                         | 70%                                                           |
| 10 | Brust <sup>11</sup>              | Yes             | Duration of intensive phase                                                                                                                                                    | No                        |                                                    |                                             | none                                                          |
| 11 | Cegielski <sup>12,13</sup>       | Yes and No      | In Estonia, Latvia, Russia, South Africa, and Masan, South Korea, most patients were hospitalized to initiate treatment but in the other countries very few were hospitalized. | Yes and No                | CB, HF                                             | HCW                                         | 70% full DOT, 23% partial DOT, 7% no DOT                      |
| 12 | Chan (Denver) <sup>14</sup>      | U               | U                                                                                                                                                                              | U                         | U                                                  | U                                           | U                                                             |
| 13 | Dheda <sup>15-17</sup>           | Yes             | All patients were admitted until culture conversion, or death.                                                                                                                 | Yes                       | HF                                                 | HCW                                         | 70-90 % during the intensive phase                            |
| 14 | Fox <sup>18</sup>                | Yes             | Variable, according to sputum culture conversion. Typically at least two months.                                                                                               | Yes                       | HF                                                 | HCW                                         | 100                                                           |
| 15 | Gegia <sup>19</sup>              | Yes             | Average 6 month                                                                                                                                                                | Yes                       | HF                                                 | HCW                                         | 80%                                                           |
| 16 | Guglielmetti <sup>20,21</sup>    | Yes             | Until culture conversion                                                                                                                                                       | Yes                       | CB, HF                                             | HCW                                         | selected patients only                                        |
| 17 | Guglielmetti <sup>22</sup>       | Yes             | Until culture conversion                                                                                                                                                       | Yes                       | CB, HF                                             | HCW                                         | selected patients only                                        |
| 18 | Hughes <sup>23</sup>             | No              | Only if clinically unstable and unable to attend clinic daily.                                                                                                                 | Yes                       | HF                                                 | HCW                                         | First 6 months                                                |
| 19 | Isaakidis <sup>23,24</sup>       | No              | N/A                                                                                                                                                                            | Yes                       | CB, HF                                             | Family/Friend, HCW                          | 20%                                                           |
| 20 | Jarlsberg <sup>25</sup>          | No              | N/A                                                                                                                                                                            | Yes                       | CB, HF                                             | HCW, Smartphone based DOT                   | 80%                                                           |
| 21 | Kempker <sup>26</sup>            | Yes             | Until sputum smear or culture conversion and clinical improvement.                                                                                                             | Yes                       | HF                                                 | HCW                                         | 100%                                                          |
| 22 | Koenig <sup>27</sup>             | Yes             | 3-6 months                                                                                                                                                                     | Yes                       | CB, HF                                             | HCW                                         | 86% DOT                                                       |
| 23 | Koh <sup>28,29</sup>             | No              | At initiation of treatment for at least 2 weeks.                                                                                                                               | Yes and No                | U                                                  | U                                           | none                                                          |
| 24 | Kuksa <sup>30</sup>              | No              | Till Smear conversion to negative                                                                                                                                              | Yes                       | HF                                                 | HCW                                         | U                                                             |
| 25 | Kvasnovsky <sup>31,32</sup>      | Yes             | XDR TB – until completion of intensive phase of treatment and >2 consecutive negative sputum samples.                                                                          | Yes                       | U                                                  | U                                           | Many patients received DOT others were seen monthly           |
| 26 | Lange <sup>33</sup>              | Yes             | U                                                                                                                                                                              | Yes                       | U                                                  | Highly variable                             | N/A                                                           |
| 27 | Laniado-Laborin <sup>34</sup>    | No              | N/A                                                                                                                                                                            | Yes                       | CB                                                 | HCW                                         | 100%                                                          |
| 28 | Leung <sup>35,36</sup>           | Yes             | 2-8 weeks                                                                                                                                                                      | Yes                       | HF                                                 | HCW                                         | >90%                                                          |
| 29 | Marks <sup>37</sup>              | Yes             | Average 2 months                                                                                                                                                               | Yes                       | U                                                  | U                                           | Average >90%                                                  |
| 30 | Migliori <sup>38,39</sup>        | Yes             | 60 to 90 days                                                                                                                                                                  | Yes                       | CB, HF                                             | HCW                                         | 80%+                                                          |
| 31 | Migliori (BDQ) <sup>40</sup>     | Yes             | median (IQR) 179 (92–280) days                                                                                                                                                 | Yes                       | CB, HF                                             | HCW                                         | U                                                             |
| 32 | Milanov <sup>41</sup>            | Yes             | Average 8 months                                                                                                                                                               | Yes                       | HF                                                 | HCW                                         | U                                                             |
| 33 | Ndjeka <sup>42</sup>             | Varies          | U                                                                                                                                                                              | Varies                    | U                                                  | U                                           | U                                                             |
| 34 | Ndjeka <sup>43</sup>             | Varies          | U                                                                                                                                                                              | Varies                    | U                                                  | U                                           | U                                                             |

| No | Contact person (ref)            | Hospitalization |                                                                                        | Directly observed therapy |                                                      |                                             |                                                                        |
|----|---------------------------------|-----------------|----------------------------------------------------------------------------------------|---------------------------|------------------------------------------------------|---------------------------------------------|------------------------------------------------------------------------|
|    |                                 | Routine? Yes/No | Duration of Hospitalization                                                            | Yes/No                    | Where: CB= Community based/ HF=Health facility based | Who: Family/Friend, HCW=Health Care Workers | % on directly observed therapy during ambulatory TB treatment          |
| 35 | O'Donnell <sup>44</sup>         | Yes             | It is routine for XDR-TB not MDR-TB. Current median inpatient time is ~2 months.       | Yes                       | CB                                                   | Family/Friend                               | U                                                                      |
| 36 | Palmero <sup>45</sup>           | Yes             | Initial phase for XDR (6-8 months) For MDR, ambulatory or short admission (<2 months). | Yes                       | HF                                                   | Only when patients are admitted             | None                                                                   |
| 37 | Podewils <sup>46</sup>          | No              |                                                                                        | Yes                       | HF                                                   |                                             | 100%                                                                   |
| 38 | Riekstina/Leimane <sup>47</sup> | Yes             | until stable smear conversion                                                          | Yes                       | HF                                                   | HCW                                         | 100%                                                                   |
| 39 | Rodrigues <sup>48</sup>         | No              | All patients were treated on an ambulatory basis                                       | yes                       | Community based                                      | HCW                                         | 3-5X/week                                                              |
| 40 | Seo <sup>49</sup>               | Yes             | Until culture conversion; for vulnerable groups up to 6 months                         | Yes                       | CB/HF                                                | HCW                                         | ~75%                                                                   |
| 41 | Seung <sup>50</sup>             | Yes             | to begin treatment, and many throughout the full course of treatment.                  | Yes                       | U                                                    | U                                           | U                                                                      |
| 42 | Shim <sup>29,51</sup>           | No              | for at least 2 weeks.                                                                  | Yes and No                | U                                                    | U                                           | PPM (private-public mix cooperation) nurses take care of the patients. |
| 43 | Singla <sup>52</sup>            | Yes             | Median 1 month                                                                         | Yes                       | HF                                                   | HCW                                         | none                                                                   |
| 44 | Skrahina <sup>53</sup>          | Yes             | 93-653 (fact.)                                                                         | Yes                       | HF                                                   | HCW                                         | 100%                                                                   |
| 45 | Smith <sup>54</sup>             | Yes             | 159/161 were hospitalized at time of enrollment                                        | Yes                       | U                                                    | U                                           | 100%                                                                   |
| 46 | TMC207-C208 <sup>55,56</sup>    | NA              | U                                                                                      | Yes                       | HF                                                   | HCW                                         | 100%                                                                   |
| 47 | TMC207-C209 <sup>57</sup>       | NA              | U                                                                                      | Yes                       | HF                                                   | HCW                                         | 100%                                                                   |
| 48 | Udwadia <sup>58</sup>           | No              | no                                                                                     | Yes                       | CB                                                   | Family/Friend                               | 80%                                                                    |
| 49 | van der Werf <sup>59</sup>      | Yes             | Median: 92 days (IQR 61–154, maximum 512)                                              | Yes                       | CB, HF                                               | HCW                                         | N/A                                                                    |
| 50 | Vasilyeva <sup>60</sup>         | U               | U                                                                                      | U                         | U                                                    | U                                           | U                                                                      |
| 51 | Viiklepp <sup>61</sup>          | Yes             | Usually 60 days,                                                                       | Yes                       | HF                                                   | HCW                                         | 90-100%                                                                |
| 52 | Yim/Kwak <sup>62</sup>          | Yes             | U                                                                                      | Yes and No                | U                                                    | U                                           | none                                                                   |

U=unknown

## Appendix Table 4. Outcome Definitions Used for Each Dataset in the Individual Patient Database

| No | Contact person (ref)             | Cure                                                                                | Treatment Completed                                                         | Treatment Failure                                                                                                               | Death    | Lost to follow-up                                                             | Relapse / Recurrence    |
|----|----------------------------------|-------------------------------------------------------------------------------------|-----------------------------------------------------------------------------|---------------------------------------------------------------------------------------------------------------------------------|----------|-------------------------------------------------------------------------------|-------------------------|
| 1  | Ahmad <sup>1</sup>               | Laserson                                                                            | Laserson                                                                    | Laserson                                                                                                                        | Laserson | Laserson                                                                      | N/A                     |
| 2  | Ahuja <sup>2</sup>               | Laserson                                                                            | Laserson                                                                    | Laserson                                                                                                                        | Laserson | Laserson                                                                      | Laserson                |
| 3  | Anderson <sup>3</sup>            | Not reported                                                                        | Complete a full course of therapy within 12/24 months of starting treatment | Patient found to have stopped treatment (by choice) or for any other reason not mentioned below.                                | Laserson | Unable to contact patient before end of treatment. Treatment outcome unknown. | Laserson                |
| 4  | Bang <sup>4</sup>                | Laserson                                                                            | Laserson                                                                    | Laserson                                                                                                                        | Laserson | Laserson                                                                      | Laserson                |
| 5  | Barkane <sup>5</sup>             | Laserson                                                                            | Laserson                                                                    | Laserson                                                                                                                        | Laserson | Laserson                                                                      | WHO                     |
| 6  | Barry (Korea) <sup>6,7</sup>     | Laserson                                                                            | Laserson                                                                    | No culture conversion after 6 months of treatment                                                                               | Laserson | Laserson                                                                      | Laserson                |
| 7  | Barry/Flood (Calif) <sup>8</sup> | See footnote: A                                                                     | Laserson                                                                    | See footnote: B                                                                                                                 | Laserson | Laserson                                                                      | Not used as an outcome. |
| 8  | Bonnet <sup>9</sup>              | Laserson                                                                            | Laserson                                                                    | Laserson                                                                                                                        | Laserson | Laserson                                                                      | Laserson                |
| 9  | Brode <sup>10</sup>              | Laserson                                                                            | Laserson                                                                    | 2013 WHO                                                                                                                        | Laserson | Laserson                                                                      | Laserson                |
| 10 | Brust <sup>11</sup>              | Laserson                                                                            | Laserson                                                                    | Laserson                                                                                                                        | Laserson | Laserson                                                                      | Laserson                |
| 11 | Cegielski <sup>12,13</sup>       | Laserson                                                                            | Laserson                                                                    | Laserson                                                                                                                        | Laserson | Laserson                                                                      | Not assessed            |
| 12 | Chan (Denver) <sup>14</sup>      | Laserson                                                                            | Laserson                                                                    | Laserson                                                                                                                        | Laserson | Laserson                                                                      | Laserson                |
| 13 | Dheda <sup>15-17</sup>           | Laserson                                                                            | Laserson                                                                    | Laserson                                                                                                                        | Laserson | Laserson                                                                      | Laserson                |
| 14 | Fox <sup>18</sup>                | Laserson                                                                            | Laserson                                                                    | Laserson                                                                                                                        | Laserson | Laserson                                                                      | N/A                     |
| 15 | Gegia <sup>19</sup>              | Laserson                                                                            | Laserson                                                                    | Laserson                                                                                                                        | Laserson | Laserson                                                                      | Laserson                |
| 16 | Guglielmetti <sup>20,21</sup>    | See footnote: A                                                                     | Laserson                                                                    | See footnote: B                                                                                                                 | Laserson | Laserson                                                                      | Laserson                |
| 17 | Guglielmetti <sup>22</sup>       | See footnote: A                                                                     | Laserson                                                                    | See footnote: B                                                                                                                 | Laserson | Laserson                                                                      | Laserson                |
| 18 | Hughes <sup>23</sup>             | Laserson                                                                            | Laserson                                                                    | Sputum cultures do NOT convert to negative within 6–8 months. Two consecutive positive cultures (1 month apart) after 8 months. | Laserson | Laserson                                                                      | Not assessed            |
| 19 | Isaakidis <sup>23,24</sup>       | Laserson                                                                            | Laserson                                                                    | Laserson                                                                                                                        | Laserson | Laserson                                                                      | Laserson                |
| 20 | Jarlsberg <sup>25</sup>          | Laserson                                                                            | Laserson                                                                    | Laserson                                                                                                                        | Laserson | Laserson                                                                      | Laserson                |
| 21 | Kempker <sup>26</sup>            | Laserson                                                                            | Laserson                                                                    | Laserson                                                                                                                        | Laserson | Laserson                                                                      | Laserson                |
| 22 | Koenig <sup>27</sup>             | 2008-2013, Laserson;<br>2013-2015: >3 consecutive negative results at the end of Rx | Laserson                                                                    | Positive cultures after 6 months OR 2 consecutive positive cultures after culture conversion.                                   | Laserson | Laserson                                                                      | Laserson                |
| 23 | Koh <sup>28,29</sup>             | See footnote: A                                                                     | Laserson                                                                    | See footnote: B                                                                                                                 | Laserson | Laserson                                                                      | Laserson                |
| 24 | Kuksa                            | Laserson                                                                            | Laserson                                                                    | Laserson                                                                                                                        | Laserson | Laserson                                                                      | WHO                     |
| 25 | Kvasnovsky <sup>31,32</sup>      | Laserson                                                                            | Laserson                                                                    | Laserson                                                                                                                        | Laserson | Laserson                                                                      | Laserson                |
| 26 | Lange <sup>33</sup>              | Laserson                                                                            | Laserson                                                                    | Laserson                                                                                                                        | Laserson | Laserson                                                                      | Laserson                |
| 27 | Laniado-Laborin <sup>34</sup>    | Laserson                                                                            | Laserson                                                                    | Laserson                                                                                                                        | Laserson | Laserson                                                                      | Laserson                |
| 28 | Leung <sup>35,36</sup>           | Laserson                                                                            | Laserson                                                                    | Laserson                                                                                                                        | Laserson | Laserson                                                                      | Laserson                |
| 29 | Marks <sup>37</sup>              | Not reported                                                                        | Laserson                                                                    | If >=2 positive cultures in final months of treatment; OR, treatment stopped due to AE                                          | Laserson | Laserson                                                                      | N/A                     |
| 30 | Migliori <sup>38,39</sup>        | See footnote: A                                                                     | Laserson                                                                    | See footnote: B                                                                                                                 | Laserson | Laserson                                                                      | Laserson                |
| 31 | Migliori (BDQ) <sup>40</sup>     | WHO 2013                                                                            | WHO 2013                                                                    | WHO 2013                                                                                                                        | WHO 2013 | WHO 2013                                                                      | N/A                     |
| 32 | Milanov <sup>41</sup>            | Laserson                                                                            | Laserson                                                                    | Laserson                                                                                                                        | Laserson | Laserson                                                                      | Laserson                |
| 33 | Ndjeka <sup>42</sup>             | Laserson                                                                            | Laserson                                                                    | Laserson                                                                                                                        | Laserson | Laserson                                                                      | Laserson                |
| 34 | Ndjeka <sup>43</sup>             | Laserson                                                                            | Laserson                                                                    | Laserson                                                                                                                        | Laserson | Laserson                                                                      | Laserson                |

| No | Contact person (ref)            | Cure                                                                                        | Treatment Completed | Treatment Failure | Death             | Lost to follow-up                                                                                      | Relapse / Recurrence                    |
|----|---------------------------------|---------------------------------------------------------------------------------------------|---------------------|-------------------|-------------------|--------------------------------------------------------------------------------------------------------|-----------------------------------------|
| 35 | O'Donnell <sup>44</sup>         | Laserson                                                                                    | Laserson            | Laserson          | Laserson          | Laserson                                                                                               | N/A                                     |
| 36 | Palmero <sup>45</sup>           | 2013 WHO criteria                                                                           | 2013 WHO criteria   | See footnote: B   | 2013 WHO criteria | Laserson                                                                                               | Laserson                                |
| 37 | Podewils <sup>46</sup>          | Laserson                                                                                    | Laserson            | Laserson          | Laserson          | Laserson                                                                                               | Laserson                                |
| 38 | Riekstina/Leimane <sup>47</sup> | Laserson                                                                                    | Laserson            | Laserson          | Laserson          | Laserson                                                                                               | Laserson                                |
| 39 | Rodrigues <sup>48</sup>         | 3 cultures negative at months 12, 15 and 18; or culture negative at month 15, 18, 21 and 24 | Laserson            | Laserson          | Laserson          | Patient did not return to healthy facility > 30 consecutive days or > 30 consecutive days with no DOTS | Laserson                                |
| 40 | Seo <sup>49</sup>               | Laserson                                                                                    | Laserson            | WHO 2013          | WHO 2013          | WHO 2013                                                                                               | WHO 2013                                |
| 41 | Seung <sup>50</sup>             | U                                                                                           | U                   | U                 | U                 | U                                                                                                      | U                                       |
| 42 | Shim <sup>29,51</sup>           | WHO 2013                                                                                    | WHO 2013            | WHO 2013          | WHO 2013          | WHO 2013                                                                                               | WHO 2013                                |
| 43 | Singla <sup>52</sup>            | Laserson                                                                                    | Laserson            | Laserson          | Laserson          | Laserson                                                                                               | Laserson                                |
| 44 | Skrahina <sup>53</sup>          | WHO 2013                                                                                    | WHO 2013            | WHO 2013          | WHO 2013          | WHO 2013                                                                                               | WHO 2013                                |
| 45 | Smith <sup>54</sup>             | Laserson                                                                                    | Laserson            | Laserson          | Laserson          | Laserson                                                                                               | Not assessed                            |
| 46 | TMC207-C208 <sup>55,56</sup>    | Laserson                                                                                    | Laserson            | Laserson          | Laserson          | Laserson                                                                                               | Laserson                                |
| 47 | TMC207-C209 <sup>57</sup>       | Laserson                                                                                    | Laserson            | Laserson          | Laserson          | Laserson                                                                                               | Laserson                                |
| 48 | Udwadia <sup>58</sup>           | Laserson                                                                                    | Laserson            | Laserson          | Laserson          | Laserson                                                                                               | Laserson                                |
| 49 | van der Werf <sup>59</sup>      | Negative cultures, after initial positive culture.                                          | Laserson            | Laserson          | Laserson          | Laserson                                                                                               | No relapses or recurrences in the study |
| 50 | Vasilyeva <sup>60</sup>         | U                                                                                           | U                   | U                 | U                 | U                                                                                                      | U                                       |
| 51 | Viiklepp <sup>61</sup>          | Laserson                                                                                    | Laserson            | Laserson          | Laserson          | Laserson                                                                                               | Laserson                                |
| 52 | Yim/Kwak <sup>62</sup>          | See footnote: A                                                                             | Laserson            | See footnote: B   | Laserson          | Laserson                                                                                               | Laserson                                |

*Laserson outcome definitions*

*Cure: An MDR-TB patient who has completed treatment according to country protocol and has been consistently culture-negative (with at least five results) for the final 12 months of treatment. If only one positive culture is reported during that time, and there is no concomitant clinical evidence of deterioration, a patient may still be considered cured, provided that this positive culture is followed by a minimum of three consecutive negative cultures, taken at least 30 days apart.*

*Treatment completed: An MDR-TB patient who has completed treatment according to country protocol but does not meet the definition for cure or treatment failure due to lack of reported bacteriologic results (i.e., fewer than five cultures were performed in the final 12 months of therapy).*

*Death: An MDR-TB patient who dies for any reason during the course of MDR-TB treatment.*

*Lost to Follow-up: An MDR-TB patient whose MDR-TB treatment was interrupted for 2 or more consecutive months for any reason.*

*Treatment failure: Treatment will be considered to have failed if two or more of the five cultures recorded in the final 12 months are positive, or if any one of the final three cultures is positive. Treatment will also be considered to have failed if a clinical decision has been made to terminate treatment early due to poor response or adverse events*

*Commonly used alternative outcome definitions:*

*For Cure: Treatment completed as planned, or as per national guidelines, AND at least 3 consecutive negative cultures (at least one month apart) after the end of the intensive phase*

*For Failure: Treatment terminated or permanent change of >2 anti-TB drugs because of: lack of conversion by the end of the intensive phase; OR, bacteriological reversion after conversion; OR, acquired resistance to fluoroquinolones or second-line injectables; OR, adverse events.*

WHO 2013 Outcome Definitions Reference: WHO. WHO Consolidated Guidelines on Tuberculosis. Module 4, Treatment: Drug-Resistant Tuberculosis Treatment. Geneva: World Health Organization, 2020 <https://www.who.int/publications/i/item/9789240007048> (accessed July 31, 2020).

Laserson Outcome Definitions Reference: Laserson KF, Thorpe LE, Leimane V, et al. Speaking the same language: treatment outcome definitions for multidrug-resistant tuberculosis. *Int J Tuberc Lung Dis* 2005; 9: 640–5.



## Appendix Table 5. Proportion of Included Patients with Missing Data for Variables Used in Statistical Analysis

| Covariate                                      | Total, n (%) | AFB Smear Negative & No Cavities on CXR | AFB Smear Negative but Cavities on CXR | AFB Smear Positive but No Cavities on CXR | AFB Smear Positive & Cavities on CXR |
|------------------------------------------------|--------------|-----------------------------------------|----------------------------------------|-------------------------------------------|--------------------------------------|
| <b>Total Participants Included</b>             | N = 5596     | N = 774                                 | N = 647                                | N = 1424                                  | N = 2751                             |
| <b>Bilateral Disease Missing</b>               | 1406 (25.1%) | 205 (26.5%)                             | 203 (31.4%)                            | 443 (31.1%)                               | 555 (20.2%)                          |
| <b>BMI Missing</b>                             | 1407 (25.1%) | 251 (32.4%)                             | 144 (22.3%)                            | 382 (26.8%)                               | 630 (22.9%)                          |
| <b>Previous Tuberculosis Treatment Missing</b> | 38 (0.7%)    | 4 (0.5%)                                | 7 (1.1%)                               | 8 (0.6%)                                  | 19 (0.7%)                            |
| <b>HIV Missing</b>                             | 108 (1.9%)   | 16 (2.1%)                               | 11 (1.7%)                              | 33 (2.3%)                                 | 48 (1.7%)                            |
| <b>Fluoroquinolone DST Missing</b>             | 280 (5%)     | 36 (4.7%)                               | 39 (6%)                                | 62 (4.4%)                                 | 143 (5.2%)                           |
| <b>Second-Line Injectable DST Missing</b>      | 270 (4.8%)   | 34 (4.4%)                               | 37 (5.7%)                              | 62 (4.4%)                                 | 137 (5%)                             |
| <b>Ethambutol DST Missing</b>                  | 457 (8.2%)   | 96 (12.4%)                              | 98 (15.1%)                             | 81 (5.7%)                                 | 182 (6.6%)                           |
| <b>Pyrazinamide DST Missing</b>                | 1705 (30.5%) | 172 (22.2%)                             | 240 (37.1%)                            | 422 (29.6%)                               | 871 (31.7%)                          |
| <b>Streptomycin DST Missing</b>                | 735 (13.1%)  | 148 (19.1%)                             | 159 (24.6%)                            | 122 (8.6%)                                | 306 (11.1%)                          |
| <b>PAS DST Missing</b>                         | 1780 (31.8%) | 314 (40.6%)                             | 260 (40.2%)                            | 435 (30.5%)                               | 771 (28%)                            |
| <b>Ethionamide/Prothionamide DST Missing</b>   | 1012 (18.1%) | 166 (21.4%)                             | 186 (28.7%)                            | 213 (15%)                                 | 447 (16.2%)                          |

Note: age was missing for one person (who was AFB smear positive with cavities on CXR) and sex missing for another person (who was AFB smear positive with cavities on CXR).

Abbreviations: DST, drug susceptibility test; HIV, human immunodeficiency virus; BMI, body mass index; AFB, acid fast bacilli; CXR, chest x-ray; PAS, para-aminosalicylic acid

## Appendix Table 6. Characteristics of Included vs. Excluded Participants

| Characteristic                                                               | Included      | Excluded <sup>o</sup> |     |
|------------------------------------------------------------------------------|---------------|-----------------------|-----|
| <b>Number Included in Study</b>                                              | 5596          | 7342                  |     |
| <b>Demographic Characteristics†</b>                                          |               |                       |     |
| Median (IQR) Age, Years                                                      | 37 (28 to 47) | 35 (27 to 43)         | *** |
| Male Sex                                                                     | 3580 (64%)    | 4294 (58.5%)          | *** |
| Body Mass Index <18.5 kg/m <sup>2</sup>                                      | 1324 (31.6%)  | 674 (40.3%)           | *** |
| <b>World Bank Income Classification of Country Where Participant Treated</b> |               |                       |     |
| Treated in Low or Lower-Middle Income Country                                | 1029 (18.4%)  | 1612 (22%)            | *** |
| Treated in Upper-Middle Income Country                                       | 2180 (39%)    | 5461 (74.4%)          | *** |
| Treated in High-Income Country                                               | 2387 (42.7%)  | 269 (3.7%)            | *** |
| <b>Clinical Characteristics‡</b>                                             |               |                       |     |
| Bilateral Disease on Chest X-Ray                                             | 2884 (68.8%)  | 904 (71.1%)           |     |
| Previously Treated for Tuberculosis                                          | 4055 (73%)    | 4884 (68.4%)          | *** |
| Previously Treated for Tuberculosis with Second Line Drugs                   | 1442 (25.9%)  | 728 (10.2%)           | *** |
| Living with HIV                                                              | 686 (12.5%)   | 3287 (48.5%)          | *** |
| If Living with HIV, Receiving Antiretroviral Treatment                       | 362 (52.8%)   | 2708 (82.4%)          | *** |
| <b>Disease Characteristics‡</b>                                              |               |                       |     |
| Fluoroquinolone Resistant                                                    | 1531 (28.8%)  | 1402 (19.5%)          | *** |
| Second-Line Injectable Resistant                                             | 1800 (33.8%)  | 1368 (19%)            | *** |
| Resistant to Both Fluoroquinolone & Second-Line Injectables                  | 933 (17.6%)   | 895 (12.5%)           | *** |
| <b>Treatment Given</b>                                                       |               |                       |     |
| Moxifloxacin or Levofloxacin Given                                           | 3243 (58%)    | 5276 (71.9%)          | *** |
| Linezolid Given                                                              | 998 (17.8%)   | 1030 (14%)            | *** |
| Bedaquiline Given                                                            | 746 (13.3%)   | 1369 (18.6%)          | *** |
| Cycloserine or Terizidone Given                                              | 4312 (77.1%)  | 6320 (86.1%)          | *** |
| Clofazimine Given                                                            | 394 (7%)      | 1165 (15.9%)          | *** |
| Amikacin Given                                                               | 1241 (22.2%)  | 572 (7.8%)            | *** |
| Kanamycin or Capreomycin Given                                               | 3552 (63.5%)  | 5772 (78.6%)          | *** |
| Ethionamide or Prothionamide Given                                           | 4425 (79.1%)  | 6220 (84.7%)          | *** |
| Pyrazinamide Given                                                           | 4058 (72.5%)  | 6761 (92.1%)          | *** |
| Carbapenems Given                                                            | 241 (4.3%)    | 12 (0.2%)             | *** |
| Received ≥4 Effective Drugs                                                  | 4113 (73.5%)  | 5785 (78.8%)          | *** |
| <b>Year of Treatment Initiation</b>                                          |               |                       |     |
| 1993-2003                                                                    | 206 (3.7%)    | 1491 (20.3%)          | *** |
| 2004-2008                                                                    | 3105 (55.5%)  | 1276 (17.4%)          | *** |
| 2009-2012                                                                    | 1574 (28.1%)  | 647 (8.8%)            | *** |
| 2013-2016                                                                    | 711 (12.7%)   | 3928 (53.5%)          | *** |

<sup>o</sup>p < 0.05; <sup>\*\*</sup>p < 0.01; <sup>\*\*\*</sup>p < 0.001 across groups according to Kruskal-Wallis test for age, and according to Chi-Square test for all others

†Percentages reflective of those where the information is known

<sup>o</sup>see Appendix Figure 1, for detailed reasons for exclusion

Abbreviations: IQR, interquartile range; HIV, human immunodeficiency virus

## Appendix Table 7. Included Participants by Country or Region of Treatment

| Country                            | Total, n (%)    | AFB Smear Negative & No Cavities on CXR | AFB Smear Negative but Cavities on CXR | AFB Smear Positive but No Cavities on CXR | AFB Smear Positive & Cavities on CXR |
|------------------------------------|-----------------|-----------------------------------------|----------------------------------------|-------------------------------------------|--------------------------------------|
| <b>Total Participants Included</b> | <b>N = 5596</b> | <b>N = 774</b>                          | <b>N = 647</b>                         | <b>N = 1424</b>                           | <b>N = 2751</b>                      |
| South Africa                       | 990 (17.7%)     | 106 (13.7%)                             | 117 (18.1%)                            | 224 (15.7%)                               | 543 (19.7%)                          |
| South Korea                        | 696 (12.4%)     | 147 (19%)                               | 100 (15.5%)                            | 154 (10.8%)                               | 295 (10.7%)                          |
| Russia                             | 530 (9.5%)      | 39 (5%)                                 | 110 (17%)                              | 30 (2.1%)                                 | 351 (12.8%)                          |
| Philippines                        | 445 (8%)        | 10 (1.3%)                               | 9 (1.4%)                               | 210 (14.7%)                               | 216 (7.9%)                           |
| Latvia                             | 374 (6.7%)      | 100 (12.9%)                             | 70 (10.8%)                             | 22 (1.5%)                                 | 182 (6.6%)                           |
| Estonia                            | 350 (6.3%)      | 85 (11%)                                | 51 (7.9%)                              | 47 (3.3%)                                 | 167 (6.1%)                           |
| Georgia                            | 336 (6%)        | 13 (1.7%)                               | 9 (1.4%)                               | 190 (13.3%)                               | 124 (4.5%)                           |
| USA                                | 255 (4.6%)      | 58 (7.5%)                               | 15 (2.3%)                              | 101 (7.1%)                                | 81 (2.9%)                            |
| Peru                               | 253 (4.5%)      | 18 (2.3%)                               | 25 (3.9%)                              | 98 (6.9%)                                 | 112 (4.1%)                           |
| Hong Kong                          | 198 (3.5%)      | 41 (5.3%)                               | 9 (1.4%)                               | 51 (3.6%)                                 | 97 (3.5%)                            |
| Pakistan                           | 180 (3.2%)      | 14 (1.8%)                               | 3 (0.5%)                               | 100 (7%)                                  | 63 (2.3%)                            |
| Germany                            | 144 (2.6%)      | 28 (3.6%)                               | 26 (4%)                                | 33 (2.3%)                                 | 57 (2.1%)                            |
| Italy                              | 107 (1.9%)      | 8 (1%)                                  | 5 (0.8%)                               | 23 (1.6%)                                 | 71 (2.6%)                            |
| Belarus                            | 106 (1.9%)      | 22 (2.8%)                               | 39 (6%)                                | 8 (0.6%)                                  | 37 (1.3%)                            |
| Brazil                             | 104 (1.9%)      | 4 (0.5%)                                | 5 (0.8%)                               | 18 (1.3%)                                 | 77 (2.8%)                            |
| Asia†                              | 83 (1.5%)       | 13 (1.7%)                               | 9 (1.4%)                               | 19 (1.3%)                                 | 42 (1.5%)                            |
| India                              | 68 (1.2%)       | 0 (0%)                                  | 2 (0.3%)                               | 15 (1.1%)                                 | 51 (1.9%)                            |
| Thailand                           | 56 (1%)         | 2 (0.3%)                                | 4 (0.6%)                               | 16 (1.1%)                                 | 34 (1.2%)                            |
| Other*                             | 321 (5.7%)      | 66 (8.5%)                               | 39 (6.0%)                              | 65 (4.6%)                                 | 151 (5.5%)                           |

Abbreviations: HIV, human immunodeficiency virus; BMI, body mass index

\*France, Europe, Taiwan, Netherlands, Australia, Canada, Belgium, Denmark, Greece, Ecuador, United Kingdom, Slovakia, Sweden, Argentina, Portugal

†Studies were conducted across multiple sites in this region, but exact country is unknown.

## Appendix Table 8. Multivariable Estimates and Stratified Analyses Assessing Effect Modification of AFB and CXR Cavitation on Mortality

| Characteristic                                             | AFB Smear Negative & Cavities on CXR<br>Adjusted Odds Ratio (95% CI)<br>Reference: Smear Negative & No Cavities on CXR | AFB Smear Positive & No Cavities on CXR<br>Adjusted Odds Ratio (95% CI)<br>Reference: Smear Negative & No Cavities on CXR | AFB Smear Positive & Cavities on CXR<br>Adjusted Odds Ratio (95% CI)<br>Reference: Smear Negative & No Cavities on CXR | p for interaction |
|------------------------------------------------------------|------------------------------------------------------------------------------------------------------------------------|---------------------------------------------------------------------------------------------------------------------------|------------------------------------------------------------------------------------------------------------------------|-------------------|
| <b>Age</b>                                                 |                                                                                                                        |                                                                                                                           |                                                                                                                        |                   |
| <37 years                                                  | 1.1 (0.6 to 2.1)                                                                                                       | 1.3 (0.8 to 2.4)                                                                                                          | 1.8 (1.1 to 3.0)                                                                                                       | 0.304             |
| ≥37 years                                                  | 1.1 (0.7 to 1.8)                                                                                                       | 1.0 (0.7 to 1.6)                                                                                                          | 1.2 (0.8 to 1.8)                                                                                                       |                   |
| <b>Sex</b>                                                 |                                                                                                                        |                                                                                                                           |                                                                                                                        |                   |
| Female                                                     | 1.0 (0.5 to 2.1)                                                                                                       | 1.2 (0.7 to 2.1)                                                                                                          | 1.7 (0.97 to 3.0)                                                                                                      | 0.526             |
| Male                                                       | 1.1 (0.7 to 1.8)                                                                                                       | 1.2 (0.7 to 1.8)                                                                                                          | 1.3 (0.9 to 2.0)                                                                                                       |                   |
| <b>Body Mass Index</b>                                     |                                                                                                                        |                                                                                                                           |                                                                                                                        |                   |
| <18.5 kg/m <sup>2</sup>                                    | 0.8 (0.4 to 1.6)                                                                                                       | 1.0 (0.5 to 2.0)                                                                                                          | 1.4 (0.8 to 2.5)                                                                                                       | 0.564             |
| ≥18.5 kg/m <sup>2</sup>                                    | 1.3 (0.8 to 2.1)                                                                                                       | 1.3 (0.8 to 2.1)                                                                                                          | 1.5 (0.99 to 2.4)                                                                                                      |                   |
| <b>Country Level Income</b>                                |                                                                                                                        |                                                                                                                           |                                                                                                                        |                   |
| High Income                                                | 1.4 (0.7 to 3.0)                                                                                                       | 1.0 (0.5 to 1.9)                                                                                                          | 1.6 (0.9 to 2.8)                                                                                                       | 0.945             |
| Upper Middle Income                                        | 1.0 (0.6 to 1.7)                                                                                                       | 1.3 (0.8 to 2.1)                                                                                                          | 1.5 (0.9 to 2.3)                                                                                                       |                   |
| Low and Low-Middle Income                                  | 1.4 (0.2 to 7.6)                                                                                                       | 1.0 (0.3 to 3.1)                                                                                                          | 1.4 (0.4 to 4.3)                                                                                                       |                   |
| <b>Bilateral Disease on CXR</b>                            |                                                                                                                        |                                                                                                                           |                                                                                                                        |                   |
| Unilateral Disease on CXR                                  | 0.6 (0.2 to 1.6)                                                                                                       | 0.9 (0.4 to 1.9)                                                                                                          | 1.0 (0.5 to 2.0)                                                                                                       | 0.725             |
| Bilateral Disease on CXR                                   | 1.1 (0.6 to 1.9)                                                                                                       | 1.2 (0.7 to 2.0)                                                                                                          | 1.3 (0.8 to 2.1)                                                                                                       |                   |
| <b>Previous Treatment with First- or Second-Line Drugs</b> |                                                                                                                        |                                                                                                                           |                                                                                                                        |                   |
| Does Not Have Previous Treatment                           | 2.2 (1.02 to 4.7)                                                                                                      | 1.4 (0.7 to 3.0)                                                                                                          | 1.8 (0.9 to 3.4)                                                                                                       | 0.422             |
| Has Previous Treatment                                     | 0.9 (0.6 to 1.4)                                                                                                       | 1.1 (0.7 to 1.6)                                                                                                          | 1.4 (0.9 to 2.0)                                                                                                       |                   |
| <b>HIV Status</b>                                          |                                                                                                                        |                                                                                                                           |                                                                                                                        |                   |
| HIV Negative                                               | 1.3 (0.8 to 2.1)                                                                                                       | 1.3 (0.8 to 2.1)                                                                                                          | 1.8 (1.2 to 2.8)                                                                                                       | 0.109             |
| HIV Positive                                               | 0.8 (0.4 to 1.6)                                                                                                       | 0.8 (0.5 to 1.5)                                                                                                          | 1.0 (0.5 to 1.7)                                                                                                       |                   |
| <b>Resistance Patterns</b>                                 |                                                                                                                        |                                                                                                                           |                                                                                                                        |                   |
| Susceptible to FQ and SLI                                  | 1.0 (0.5 to 2.2)                                                                                                       | 1.3 (0.7 to 2.3)                                                                                                          | 1.5 (0.9 to 2.7)                                                                                                       | 0.221             |
| Resistant to FQ, Susceptible to SLI                        | 9.0 (1.1 to 76.7)                                                                                                      | 3.1 (0.4 to 24.7)                                                                                                         | 5.7 (0.7 to 43.9)                                                                                                      |                   |
| Resistant to SLI, Susceptible to FQ                        | 1.0 (0.4 to 2.5)                                                                                                       | 0.6 (0.2 to 1.6)                                                                                                          | 1.1 (0.5 to 2.5)                                                                                                       |                   |
| Resistant to FQ and SLI                                    | 1.1 (0.6 to 2.1)                                                                                                       | 1.5 (0.8 to 2.9)                                                                                                          | 1.6 (0.9 to 2.9)                                                                                                       |                   |
| <b>Received Bedaquiline and/or Linezolid</b>               |                                                                                                                        |                                                                                                                           |                                                                                                                        |                   |
| No Bedaquiline or Linezolid                                | 1.0 (0.6 to 1.5)                                                                                                       | 1.1 (0.8 to 1.6)                                                                                                          | 1.2 (0.9 to 1.7)                                                                                                       | 0.012             |
| Received Bedaquiline and/or Linezolid                      | 4.0 (0.8 to 20.1)                                                                                                      | 2.1 (0.4 to 10.0)                                                                                                         | 7.0 (1.7 to 29.3)                                                                                                      |                   |
| <b>Number of Effective Drugs</b>                           |                                                                                                                        |                                                                                                                           |                                                                                                                        |                   |
| Received <4 Effective Drugs                                | 1.2 (0.6 to 2.2)                                                                                                       | 1.6 (0.9 to 3.0)                                                                                                          | 1.4 (0.8 to 2.4)                                                                                                       | 0.267             |
| Received ≥4 Effective Drugs                                | 1.1 (0.6 to 1.9)                                                                                                       | 1.0 (0.6 to 1.6)                                                                                                          | 1.5 (0.97 to 2.4)                                                                                                      |                   |
| <b>Year of Treatment Initiation</b>                        |                                                                                                                        |                                                                                                                           |                                                                                                                        |                   |
| 1993-2003                                                  | 19.2 (1.01 to 369.7)                                                                                                   | 1.4 (0.1 to 16.3)                                                                                                         | 0.6 (0.0 to 9.4)                                                                                                       | 0.015             |
| 2004-2008                                                  | 0.9 (0.5 to 1.4)                                                                                                       | 1.2 (0.8 to 1.9)                                                                                                          | 1.2 (0.8 to 1.7)                                                                                                       |                   |
| 2009-2012                                                  | 1.8 (0.6 to 5.6)                                                                                                       | 1.2 (0.5 to 2.9)                                                                                                          | 3.4 (1.5 to 7.7)                                                                                                       |                   |
| 2013-2016                                                  | 1.5 (0.4 to 5.8)                                                                                                       | 0.7 (0.1 to 3.8)                                                                                                          | 2.1 (0.6 to 7.0)                                                                                                       |                   |

†Models are adjusted in the following way, except in cases where the variable is under stratification, in which case it is excluded. Multivariable models adjusted for country level income, resistance to fluoroquinolones, resistance to second-line injectables, number of effective group A drugs received, number of other effective drugs received, HIV-infection and antiretroviral therapy use, age, sex, year of treatment initiation, bilateral disease, previous treatment, and underweight body mass index (<18.5 kg/m<sup>2</sup>). All models account for clustering at the study-level.

Abbreviations: 95% CI, 95% confidence interval; FQ, fluoroquinolone; SLI, second-line injectable; HIV, human immunodeficiency virus; ART, antiretroviral therapy; AFB, acid fast bacilli; CXR, chest x-ray

Note: P-values for interaction come from a likelihood ratio test of models with vs. without interaction terms for the variable under study. A p-value <0.05 was considered statistically significant.

## Appendix Table 9. Multivariable Estimates and Stratified Analyses Assessing Effect Modification of AFB and CXR Cavitation on Failure or Recurrence

| Characteristic                                             | AFB Smear Negative & Cavities on CXR<br>Adjusted Odds Ratio (95% CI)†<br>Reference: Smear Negative & No Cavities on CXR | AFB Smear Positive & No Cavities on CXR<br>Adjusted Odds Ratio (95% CI)†<br>Reference: Smear Negative & No Cavities on CXR | AFB Smear Positive & Cavities on CXR<br>Adjusted Odds Ratio (95% CI)†<br>Reference: Smear Negative & No Cavities on CXR | p for interaction |
|------------------------------------------------------------|-------------------------------------------------------------------------------------------------------------------------|----------------------------------------------------------------------------------------------------------------------------|-------------------------------------------------------------------------------------------------------------------------|-------------------|
| <b>Age</b>                                                 |                                                                                                                         |                                                                                                                            |                                                                                                                         |                   |
| <37 years                                                  | 1.0 (0.5 to 2.3)                                                                                                        | 1.6 (0.8 to 3.2)                                                                                                           | 2.7 (1.4 to 5.2)                                                                                                        | 0.439             |
| ≥37 years                                                  | 1.0 (0.5 to 1.9)                                                                                                        | 1.2 (0.7 to 2.2)                                                                                                           | 1.8 (1.1 to 3.0)                                                                                                        |                   |
| <b>Sex</b>                                                 |                                                                                                                         |                                                                                                                            |                                                                                                                         |                   |
| Female                                                     | 1.1 (0.6 to 2.1)                                                                                                        | 1.3 (0.7 to 2.2)                                                                                                           | 2.0 (1.2 to 3.2)                                                                                                        | 0.937             |
| Male                                                       | 1.1 (0.6 to 2.2)                                                                                                        | 1.6 (0.9 to 2.9)                                                                                                           | 2.5 (1.4 to 4.4)                                                                                                        |                   |
| <b>Body Mass Index</b>                                     |                                                                                                                         |                                                                                                                            |                                                                                                                         |                   |
| <18.5 kg/m <sup>2</sup>                                    | 1.4 (0.5 to 4.0)                                                                                                        | 1.4 (0.5 to 3.6)                                                                                                           | 2.2 (0.9 to 5.0)                                                                                                        | 0.819             |
| ≥18.5 kg/m <sup>2</sup>                                    | 0.9 (0.5 to 1.7)                                                                                                        | 1.4 (0.8 to 2.4)                                                                                                           | 2.2 (1.4 to 3.6)                                                                                                        |                   |
| <b>Country Level Income</b>                                |                                                                                                                         |                                                                                                                            |                                                                                                                         |                   |
| High Income                                                | 0.8 (0.4 to 1.4)                                                                                                        | 1.8 (1.1 to 2.9)                                                                                                           | 1.9 (1.3 to 2.9)                                                                                                        | 0.101             |
| Upper Middle Income                                        | 1.3 (0.6 to 2.5)                                                                                                        | 1.1 (0.5 to 2.2)                                                                                                           | 2.7 (1.4 to 4.9)                                                                                                        |                   |
| Low and Low-Middle Income                                  | --*                                                                                                                     | --*                                                                                                                        | --*                                                                                                                     |                   |
| <b>Bilateral Disease on CXR</b>                            |                                                                                                                         |                                                                                                                            |                                                                                                                         |                   |
| Unilateral Disease on CXR                                  | 0.8 (0.2 to 2.7)                                                                                                        | 2.0 (0.9 to 4.3)                                                                                                           | 1.9 (0.9 to 3.9)                                                                                                        | 0.369             |
| Bilateral Disease on CXR                                   | 1.3 (0.5 to 3.1)                                                                                                        | 1.7 (0.8 to 3.9)                                                                                                           | 2.8 (1.4 to 5.9)                                                                                                        |                   |
| <b>Previous Treatment with First- or Second-Line Drugs</b> |                                                                                                                         |                                                                                                                            |                                                                                                                         |                   |
| Does Not Have Previous Treatment                           | 0.5 (0.1 to 1.7)                                                                                                        | 1.2 (0.5 to 2.8)                                                                                                           | 2.4 (1.1 to 4.9)                                                                                                        | 0.592             |
| Has Previous Treatment                                     | 1.2 (0.7 to 2.1)                                                                                                        | 1.4 (0.9 to 2.4)                                                                                                           | 2.2 (1.4 to 3.5)                                                                                                        |                   |
| <b>HIV Status</b>                                          |                                                                                                                         |                                                                                                                            |                                                                                                                         |                   |
| HIV Negative                                               | 0.9 (0.5 to 1.5)                                                                                                        | 1.2 (0.7 to 1.9)                                                                                                           | 2.0 (1.3 to 3.1)                                                                                                        | 0.014             |
| HIV Positive                                               | 2.4 (0.5 to 11.1)                                                                                                       | 4.7 (1.3 to 17.2)                                                                                                          | 5.3 (1.4 to 19.3)                                                                                                       |                   |
| <b>Resistance Patterns</b>                                 |                                                                                                                         |                                                                                                                            |                                                                                                                         |                   |
| Susceptible to FQ and SLI                                  | 0.6 (0.3 to 1.5)                                                                                                        | 0.9 (0.5 to 1.8)                                                                                                           | 1.2 (0.6 to 2.2)                                                                                                        | 0.155             |
| Resistant to FQ, Susceptible to SLI                        | 0.8 (0.2 to 2.5)                                                                                                        | 1.7 (0.7 to 4.2)                                                                                                           | 2.7 (1.1 to 6.5)                                                                                                        |                   |
| Resistant to SLI, Susceptible to FQ                        | 1.3 (0.2 to 7.6)                                                                                                        | 3.1 (0.6 to 15.7)                                                                                                          | 6.3 (1.4 to 27.7)                                                                                                       |                   |
| Resistant to FQ and SLI                                    | 1.9 (0.8 to 4.6)                                                                                                        | 1.5 (0.6 to 3.7)                                                                                                           | 3.8 (1.8 to 8.1)                                                                                                        |                   |
| <b>Received Bedaquiline and/or Linezolid</b>               |                                                                                                                         |                                                                                                                            |                                                                                                                         |                   |
| No Bedaquiline or Linezolid                                | 1.1 (0.6 to 1.9)                                                                                                        | 1.7 (1.01 to 2.8)                                                                                                          | 2.5 (1.6 to 4.0)                                                                                                        | 0.812             |
| Received Bedaquiline and/or Linezolid                      | 0.7 (0.3 to 1.8)                                                                                                        | 0.9 (0.4 to 2.0)                                                                                                           | 1.7 (0.8 to 3.3)                                                                                                        |                   |
| <b>Number of Effective Drugs</b>                           |                                                                                                                         |                                                                                                                            |                                                                                                                         |                   |
| Received <4 Effective Drugs                                | 1.9 (0.8 to 4.6)                                                                                                        | 2.3 (0.96 to 5.3)                                                                                                          | 3.7 (1.7 to 7.8)                                                                                                        | 0.375             |
| Received ≥4 Effective Drugs                                | 0.6 (0.3 to 1.3)                                                                                                        | 1.0 (0.6 to 1.8)                                                                                                           | 1.6 (0.96 to 2.6)                                                                                                       |                   |
| <b>Year of Treatment Initiation</b>                        |                                                                                                                         |                                                                                                                            |                                                                                                                         |                   |
| 1993-2003                                                  | 10.3 (0.3 to 339.4)                                                                                                     | 0.8 (0.1 to 8.3)                                                                                                           | 1.8 (0.2 to 17.4)                                                                                                       | 0.750             |
| 2004-2008                                                  | 1.1 (0.6 to 2.0)                                                                                                        | 1.4 (0.8 to 2.6)                                                                                                           | 2.1 (1.2 to 3.7)                                                                                                        |                   |
| 2009-2012                                                  | 1.2 (0.4 to 3.4)                                                                                                        | 1.5 (0.7 to 3.4)                                                                                                           | 2.9 (1.4 to 6.0)                                                                                                        |                   |
| 2013-2016                                                  | 0.4 (0.1 to 1.8)                                                                                                        | 2.1 (0.5 to 9.6)                                                                                                           | 1.3 (0.4 to 4.4)                                                                                                        |                   |

†Models are adjusted in the following way, except in cases where the variable is under stratification, in which case it is excluded. Multivariable models adjusted for country level income, resistance to fluoroquinolones, resistance to second-line injectables, number of effective group A drugs received, number of other effective drugs received, HIV-infection and antiretroviral therapy use, age, sex, year of treatment initiation, bilateral disease, previous treatment, and underweight body mass index (<18.5 kg/m<sup>2</sup>). All models account for clustering at the study-level.

\*<50 participants in one or more categories with 1 or fewer events, stratified models did not converge.

Abbreviations: 95% CI, 95% confidence interval; FQ, fluoroquinolone; SLI, second-line injectable; HIV, human immunodeficiency virus; ART, antiretroviral therapy; AFB, acid fast bacilli; CXR, chest x-ray

Note: P-values for interaction come from a likelihood ratio test of models with vs. without interaction terms for the variable under study. A p-value <0.05 was considered statistically significant.

## Appendix Table 10. Characteristics of Participants Included vs. Excluded in the “Strict Complete Case Analysis”

| Characteristic                                                               | Included      | Excluded      |     |
|------------------------------------------------------------------------------|---------------|---------------|-----|
| <b>Number of Participants</b>                                                | 1806          | 3790          |     |
| <b>Indicators of Extent of Disease</b>                                       |               |               |     |
| AFB Smear Negative & No Cavities on CXR                                      | 246 (13.6%)   | 528 (13.9%)   |     |
| AFB Smear Negative & Cavities on CXR                                         | 172 (9.5%)    | 475 (12.5%)   | **  |
| AFB Smear Positive & No Cavities on CXR                                      | 464 (25.7%)   | 960 (25.3%)   |     |
| AFB Smear Positive & Cavities on CXR                                         | 924 (51.2%)   | 1827 (48.2%)  | *   |
| <b>Demographic Characteristics†</b>                                          |               |               |     |
| Median (IQR) Age, Years                                                      | 37 (28 to 48) | 37 (28 to 47) |     |
| Male Sex                                                                     | 1177 (65.2%)  | 2403 (63.4%)  |     |
| Body Mass Index <18.5 kg/m <sup>2</sup>                                      | 556 (30.8%)   | 768 (32.2%)   |     |
| <b>World Bank Income Classification of Country Where Participant Treated</b> |               |               |     |
| Treated in Low or Lower-Middle Income Country                                | 502 (27.8%)   | 527 (13.9%)   | *** |
| Treated in Upper-Middle Income Country                                       | 334 (18.5%)   | 1846 (48.7%)  | *** |
| Treated in High-Income Country                                               | 970 (53.7%)   | 1417 (37.4%)  | *** |
| <b>Clinical Characteristics†</b>                                             |               |               |     |
| Bilateral Disease on Chest X-Ray                                             | 1256 (69.5%)  | 1628 (68.3%)  |     |
| Previously Treated for Tuberculosis                                          | 1359 (75.2%)  | 2696 (71.9%)  | **  |
| Previously Treated for Tuberculosis with Second Line Drugs                   | 456 (25.2%)   | 986 (26.3%)   | *** |
| Living with HIV                                                              | 100 (5.5%)    | 586 (15.9%)   | *** |
| If Living with HIV, Receiving Antiretroviral Treatment                       | 45 (45%)      | 317 (54.1%)   |     |
| <b>Disease Characteristics†</b>                                              |               |               |     |
| Fluoroquinolone Resistant                                                    | 387 (21.4%)   | 1144 (32.6%)  | *** |
| Second-Line Injectable Resistant                                             | 485 (26.9%)   | 1315 (37.4%)  | *** |
| Resistant to Both Fluoroquinolone & Second-Line Injectables                  | 198 (11%)     | 735 (21%)     | *** |
| <b>Treatment Given</b>                                                       |               |               |     |
| Moxifloxacin or Levofloxacin Given                                           | 1079 (59.7%)  | 2164 (57.1%)  | *** |
| Linezolid Given                                                              | 239 (13.2%)   | 759 (20%)     | *** |
| Bedaquiline Given                                                            | 165 (9.1%)    | 581 (15.3%)   | *** |
| Cycloserine or Terizidone Given                                              | 1609 (89.1%)  | 2703 (71.3%)  | *** |
| Clofazimine Given                                                            | 62 (3.4%)     | 332 (8.8%)    | *** |
| Amikacin Given                                                               | 160 (8.9%)    | 1081 (28.5%)  | *** |
| Kanamycin or Capreomycin Given                                               | 1310 (72.5%)  | 2242 (59.2%)  | *** |
| Ethionamide or Prothionamide Given                                           | 1548 (85.7%)  | 2877 (75.9%)  | *** |
| Pyrazinamide Given                                                           | 1160 (64.2%)  | 2898 (76.5%)  | *** |
| Carbapenems Given                                                            | 26 (1.4%)     | 215 (5.7%)    | *** |
| Received ≥4 Effective Drugs                                                  | 1424 (78.8%)  | 2689 (70.9%)  | *** |
| <b>Year of Treatment Initiation</b>                                          |               |               |     |
| 1993-2003                                                                    | 0 (0%)        | 206 (5.4%)    | *** |
| 2004-2008                                                                    | 1182 (65.4%)  | 1923 (50.7%)  | **  |
| 2009-2012                                                                    | 465 (25.7%)   | 1109 (29.3%)  | *** |
| 2013-2016                                                                    | 159 (8.8%)    | 552 (14.6%)   | *** |
| <b>Outcomes</b>                                                              |               |               |     |
| Treatment Success                                                            | 1173 (65.0%)  | 2339 (61.7%)  | *   |
| Failure or Recurrence                                                        | 133 (7.4%)    | 301 (7.9%)    |     |
| Death                                                                        | 143 (7.9%)    | 577 (15.2%)   | *** |
| Lost to Follow-up                                                            | 357 (19.8%)   | 573 (15.1%)   | *** |

\*p < 0.05; \*\*p < 0.01; \*\*\*p < 0.001 across groups according to Kruskal-Wallis test for age, and according to Chi-Square test for all others

†Percentages reflective of those where the information is known

Abbreviations: IQR, interquartile range; HIV, human immunodeficiency virus

## Appendix Table 11. Characteristics of Participants Included vs. Excluded in the “Complete Case Except Drug Susceptibility Testing Analysis”

| Characteristic                                                               | Included      | Excluded      |     |
|------------------------------------------------------------------------------|---------------|---------------|-----|
| <b>Number of Participants</b>                                                | 3343          | 2253          |     |
| <b>Indicators of Extent of Disease</b>                                       |               |               |     |
| AFB Smear Negative & No Cavities on CXR                                      | 412 (12.3%)   | 362 (16.1%)   | *** |
| AFB Smear Negative & Cavities on CXR                                         | 366 (10.9%)   | 281 (12.5%)   |     |
| AFB Smear Positive & No Cavities on CXR                                      | 782 (23.4%)   | 642 (28.5%)   | *** |
| AFB Smear Positive & Cavities on CXR                                         | 1783 (53.3%)  | 988 (43.9%)   | *** |
| <b>Demographic Characteristics†</b>                                          |               |               |     |
| Median (IQR) Age, Years                                                      | 37 (29 to 47) | 36 (27 to 48) | *   |
| Male Sex                                                                     | 2186 (65.4%)  | 1394 (61.9%)  | **  |
| Body Mass Index <18.5 kg/m <sup>2</sup>                                      | 1094 (32.7%)  | 230 (27.2%)   | **  |
| <b>World Bank Income Classification of Country Where Participant Treated</b> |               |               |     |
| Treated in Low or Lower-Middle Income Country                                | 672 (20.1%)   | 357 (15.8%)   | *** |
| Treated in Upper-Middle Income Country                                       | 1383 (41.4%)  | 797 (35.4%)   | *** |
| Treated in High-Income Country                                               | 1288 (38.5%)  | 1099 (48.8%)  | *** |
| <b>Clinical Characteristics†</b>                                             |               |               |     |
| Bilateral Disease on Chest X-Ray                                             | 2381 (71.2%)  | 503 (59.4%)   | *** |
| Previously Treated for Tuberculosis                                          | 2549 (76.2%)  | 1506 (68%)    | *** |
| Previously Treated for Tuberculosis with Second Line Drugs                   | 759 (22.7%)   | 683 (30.8%)   | *** |
| Living with HIV                                                              | 482 (14.4%)   | 204 (9.5%)    | *** |
| If Living with HIV, Receiving Antiretroviral Treatment                       | 241 (50%)     | 121 (59.3%)   | *** |
| <b>Disease Characteristics†</b>                                              |               |               |     |
| Fluoroquinolone Resistant                                                    | 687 (21.7%)   | 844 (39.3%)   | *** |
| Second-Line Injectable Resistant                                             | 982 (30.9%)   | 818 (38.1%)   | *** |
| Resistant to Both Fluoroquinolone & Second-Line Injectables                  | 400 (12.6%)   | 533 (24.9%)   | *** |
| <b>Treatment Given</b>                                                       |               |               |     |
| Moxifloxacin or Levofloxacin Given                                           | 1561 (46.7%)  | 1682 (74.7%)  | *** |
| Linezolid Given                                                              | 380 (11.4%)   | 618 (27.4%)   | *** |
| Bedaquiline Given                                                            | 250 (7.5%)    | 496 (22%)     | *** |
| Cycloserine or Terizidone Given                                              | 2737 (81.9%)  | 1575 (69.9%)  | *** |
| Clofazimine Given                                                            | 114 (3.4%)    | 280 (12.4%)   | *** |
| Amikacin Given                                                               | 654 (19.6%)   | 587 (26.1%)   | *** |
| Kanamycin or Capreomycin Given                                               | 2299 (68.8%)  | 1253 (55.6%)  | *** |
| Ethionamide or Prothionamide Given                                           | 2865 (85.7%)  | 1560 (69.2%)  | *** |
| Pyrazinamide Given                                                           | 2488 (74.4%)  | 1570 (69.7%)  | *** |
| Carbapenems Given                                                            | 60 (1.8%)     | 181 (8%)      | *** |
| Received ≥4 Effective Drugs                                                  | 2542 (76%)    | 1571 (69.7%)  | *** |
| <b>Year of Treatment Initiation</b>                                          |               |               |     |
| 1993-2003                                                                    | 17 (0.5%)     | 189 (8.4%)    | *** |
| 2004-2008                                                                    | 2313 (69.2%)  | 792 (35.2%)   | *** |
| 2009-2012                                                                    | 655 (19.6%)   | 919 (40.8%)   | *** |
| 2013-2016                                                                    | 358 (10.7%)   | 353 (15.7%)   | *** |
| <b>Outcomes</b>                                                              |               |               |     |
| Treatment Success                                                            | 2073 (62.0%)  | 1439 (63.9%)  |     |
| Failure or Recurrence                                                        | 248 (7.4%)    | 186 (8.3%)    |     |
| Death                                                                        | 390 (11.7%)   | 330 (14.6%)   | **  |
| Lost to Follow-up                                                            | 632 (18.9%)   | 298 (13.2%)   | *** |

\*p < 0.05; \*\*p < 0.01; \*\*\*p < 0.001 across groups according to Kruskal-Wallis test for age, and according to Chi-Square test for all others

†Percentages reflective of those where the information is known

Abbreviations: IQR, interquartile range; HIV, human immunodeficiency virus

## Appendix Table 12. Multivariable Estimates of Primary Outcomes for All Analyses

| Characteristic                                          | Primary Analysis: Imputed Dataset |                   | Strict Complete Case Analysis |                  | Complete Case Except DST Analysis |                   |
|---------------------------------------------------------|-----------------------------------|-------------------|-------------------------------|------------------|-----------------------------------|-------------------|
|                                                         | n/N with Outcome                  | aOR (95% CI)      | n/N with Outcome              | aOR (95% CI)     | n/N with Outcome                  | aOR (95% CI)      |
| <b>All Unfavorable Outcomes vs. Success</b>             |                                   |                   |                               |                  |                                   |                   |
| AFB Smear Negative & No Cavities on CXR                 | 220/774                           | 1.0 (Reference)   | 56/246                        | 1.0 (Reference)  | 114/412                           | 1.0 (Reference)   |
| AFB Smear Negative & Cavities on CXR                    | 214/647                           | 1.0 (0.8 to 1.4)  | 47/172                        | 1.0 (0.6 to 1.7) | 114/366                           | 0.9 (0.7 to 1.3)  |
| AFB Smear Positive & No Cavities on CXR                 | 492/1424                          | 1.2 (0.96 to 1.5) | 168/464                       | 1.7 (1.1 to 2.5) | 286/782                           | 1.3 (0.9 to 1.7)  |
| AFB Smear Positive & Cavities on CXR                    | 1158/2751                         | 1.6 (1.3 to 2.0)  | 362/924                       | 1.6 (1.1 to 2.3) | 756/1783                          | 1.5 (1.1 to 1.9)  |
| <b>Mortality vs. Survival</b>                           |                                   |                   |                               |                  |                                   |                   |
| AFB Smear Negative & No Cavities on CXR                 | 79/774                            | 1.0 (Reference)   | 16/246                        | 1.0 (Reference)  | 39/412                            | 1.0 (Reference)   |
| AFB Smear Negative & Cavities on CXR                    | 85/647                            | 1.1 (0.7 to 1.6)  | 8/172                         | 0.7 (0.3 to 1.7) | 32/366                            | 0.7 (0.4 to 1.2)  |
| AFB Smear Positive & No Cavities on CXR                 | 166/1424                          | 1.2 (0.8 to 1.7)  | 46/464                        | 1.1 (0.5 to 2.1) | 97/782                            | 1.1 (0.7 to 1.7)  |
| AFB Smear Positive & Cavities on CXR                    | 390/2751                          | 1.5 (1.1 to 2.1)  | 73/924                        | 0.8 (0.4 to 1.6) | 222/1783                          | 1.0 (0.7 to 1.5)  |
| <b>Failure or Recurrence vs. Disease-Free Survival*</b> |                                   |                   |                               |                  |                                   |                   |
| AFB Smear Negative & No Cavities on CXR                 | 38/695                            | 1.0 (Reference)   | 6/230                         | 1.0 (Reference)  | 13/373                            | 1.0 (Reference)   |
| AFB Smear Negative & Cavities on CXR                    | 38/562                            | 1.0 (0.6 to 1.7)  | 10/164                        | 1.7 (0.6 to 5.0) | 16/334                            | 1.1 (0.5 to 2.3)  |
| AFB Smear Positive & No Cavities on CXR                 | 80/1258                           | 1.4 (0.9 to 2.2)  | 25/418                        | 3.4 (1.3 to 8.9) | 42/685                            | 1.9 (0.99 to 3.8) |
| AFB Smear Positive & Cavities on CXR                    | 278/2361                          | 2.2 (1.5 to 3.3)  | 92/851                        | 3.1 (1.3 to 7.6) | 177/1561                          | 2.6 (1.4 to 4.9)  |

Abbreviations: aOR, adjusted odds ratio; CXR, chest x-ray; DST, drug susceptibility testing

Note: multivariable models account for clustering at the study level and are adjusted for age, sex, country-level income, HIV-infection status and antiretroviral therapy use, underweight body mass index, previous tuberculosis treatment history, bilateral disease on chest x-ray, resistance to fluoroquinolones, resistance to second-line injectables, effective Group A drugs received, effective non-Group A drugs received, and year of treatment initiation.

\*Excludes all included participants who died



## Appendix Table 13. Characteristics of Participants Included vs. Excluded in Culture Conversion Analysis

| Characteristic                                                               | Included      | Excluded<br>(Culture Negative) | Excluded<br>(No Culture Info) |     |
|------------------------------------------------------------------------------|---------------|--------------------------------|-------------------------------|-----|
| <b>Number of Participants</b>                                                | 4274          | 252                            | 1070                          |     |
| <b>Demographic Characteristics†</b>                                          |               |                                |                               |     |
| Median (IQR) Age, Years                                                      | 37 (29 to 48) | 37 (28 to 46)                  | 35 (26 to 47)                 | **  |
| Male Sex                                                                     | 2779 (65%)    | 143 (56.7%)                    | 658 (61.5%)                   | **  |
| Body Mass Index <18.5 kg/m <sup>2</sup>                                      | 1059 (31.6%)  | 33 (17.5%)                     | 232 (35.7%)                   | *** |
| <b>World Bank Income Classification of Country Where Participant Treated</b> |               |                                |                               |     |
| Treated in Low or Lower-Middle Income Country                                | 720 (16.8%)   | 9 (3.6%)                       | 300 (28%)                     | *** |
| Treated in Upper-Middle Income Country                                       | 1847 (43.2%)  | 50 (19.8%)                     | 283 (26.4%)                   | *** |
| Treated in High-Income Country                                               | 1707 (39.9%)  | 193 (76.6%)                    | 487 (45.5%)                   | *** |
| <b>Clinical Characteristics†</b>                                             |               |                                |                               |     |
| Bilateral Disease on Chest X-Ray                                             | 2329 (70.1%)  | 71 (38%)                       | 484 (71%)                     | *** |
| Previously Treated for Tuberculosis                                          | 3133 (73.7%)  | 137 (54.4%)                    | 785 (74.3%)                   | *** |
| Previously Treated for Tuberculosis with Second Line Drugs                   | 1161 (27.3%)  | 61 (24.2%)                     | 220 (20.8%)                   | *** |
| Living with HIV                                                              | 524 (12.5%)   | 22 (9%)                        | 140 (13.5%)                   |     |
| If Living with HIV, Receiving Antiretroviral Treatment                       | 292 (55.7%)   | 10 (45.5%)                     | 60 (42.9%)                    |     |
| <b>Disease Characteristics†</b>                                              |               |                                |                               |     |
| Fluoroquinolone Resistant                                                    | 1135 (27.8%)  | 33 (15.2%)                     | 363 (35.8%)                   | *** |
| Second-Line Injectable Resistant                                             | 1413 (34.5%)  | 53 (24.4%)                     | 334 (32.9%)                   | **  |
| Resistant to Both Fluoroquinolone & Second-Line Injectables                  | 759 (18.6%)   | 15 (6.9%)                      | 159 (15.7%)                   | *** |
| <b>Treatment Given</b>                                                       |               |                                |                               |     |
| Moxifloxacin or Levofloxacin Given                                           | 2379 (55.7%)  | 194 (77%)                      | 670 (62.6%)                   |     |
| Linezolid Given                                                              | 789 (18.5%)   | 44 (17.5%)                     | 165 (15.4%)                   | *** |
| Bedaquiline Given                                                            | 674 (15.8%)   | 33 (13.1%)                     | 39 (3.6%)                     |     |
| Cycloserine or Terizidone Given                                              | 3318 (77.6%)  | 193 (76.6%)                    | 801 (74.9%)                   | *   |
| Clofazimine Given                                                            | 325 (7.6%)    | 14 (5.6%)                      | 55 (5.1%)                     | *** |
| Amikacin Given                                                               | 847 (19.8%)   | 43 (17.1%)                     | 351 (32.8%)                   | *** |
| Kanamycin or Capreomycin Given                                               | 2905 (68%)    | 142 (56.3%)                    | 505 (47.2%)                   | *** |
| Ethionamide or Prothionamide Given                                           | 3400 (79.6%)  | 166 (65.9%)                    | 859 (80.3%)                   | *   |
| Pyrazinamide Given                                                           | 3117 (72.9%)  | 163 (64.7%)                    | 778 (72.7%)                   | *** |
| Carbapenems Given                                                            | 221 (5.2%)    | 6 (2.4%)                       | 14 (1.3%)                     | *** |
| Received ≥4 Effective Drugs                                                  | 3235 (75.7%)  | 198 (78.6%)                    | 680 (63.6%)                   |     |
| <b>Year of Treatment Initiation</b>                                          |               |                                |                               |     |
| 1993-2003                                                                    | 156 (3.6%)    | 11 (4.4%)                      | 39 (3.6%)                     | *** |
| 2004-2008                                                                    | 2404 (56.2%)  | 93 (36.9%)                     | 608 (56.8%)                   | *** |
| 2009-2012                                                                    | 1093 (25.6%)  | 99 (39.3%)                     | 382 (35.7%)                   | *** |
| 2013-2016                                                                    | 621 (14.5%)   | 49 (19.4%)                     | 41 (3.8%)                     | *** |
| <b>Outcomes</b>                                                              |               |                                |                               |     |
| Treatment Success                                                            | 2809 (65.7%)  | 214 (84.9%)                    | 489 (45.7%)                   | *** |
| Failure or Recurrence                                                        | 399 (9.3%)    | 5 (2.0%)                       | 30 (2.8%)                     | *** |
| Death                                                                        | 448 (10.5%)   | 5 (2.0%)                       | 267 (25.0%)                   | *** |
| Lost to Follow-up                                                            | 618 (14.5%)   | 28 (11.1%)                     | 284 (26.5%)                   | *** |

\*p < 0.05; \*\*p < 0.01; \*\*\*p < 0.001 across groups according to Kruskal-Wallis test for age, and according to Chi-Square test for all others

†Percentages reflective of those where the information is known

Abbreviations: IQR, interquartile range; HIV, human immunodeficiency virus

## References

1. Ahmad N, Javaid A, Basit A, et al. Management and treatment outcomes of MDR-TB: results from a setting with high rates of drug resistance. *Int J Tuberc Lung Dis* 2015; **19**(9): 1109-14, i-ii.
2. Anger HA, Dworkin F, Sharma S, Munsiff SS, Nilsen DM, Ahuja SD. Linezolid use for treatment of multidrug-resistant and extensively drug-resistant tuberculosis, New York City, 2000-06. *The Journal of antimicrobial chemotherapy* 2010; **65**(4): 775-83.
3. Anderson LF, Tamne S, Watson JP, et al. Treatment outcome of multi-drug resistant tuberculosis in the United Kingdom: retrospective-prospective cohort study from 2004 to 2007. *Euro surveillance : bulletin Europeen sur les maladies transmissibles = European communicable disease bulletin* 2013; **18**(40).
4. Bang D, Lillebaek T, Thomsen VO, Andersen AB. Multidrug-resistant tuberculosis: treatment outcome in Denmark, 1992-2007. *Scandinavian journal of infectious diseases* 2010; **42**(4): 288-93.
5. Barkane L. Unpublished data (Riga, Latvia). 2018.
6. Lee M, Cho SN, Barry CE, 3rd, Song T, Kim Y, Jeong I. Linezolid for XDR-TB--Final Study Outcomes. *N Engl J Med* 2015; **373**(3): 290-1.
7. Lee M, Lee J, Carroll MW, et al. Linezolid for treatment of chronic extensively drug-resistant tuberculosis. *N Engl J Med* 2012; **367**(16): 1508-18.
8. Barry PM, Flood J, Lowenthal P, Westenhouse J, California Department of Public Health. Unpublished data (California, USA). 2016.
9. Bonnet M, Pardini M, Meacci F, et al. Treatment of tuberculosis in a region with high drug resistance: outcomes, drug resistance amplification and re-infection. *PLoS One* 2011; **6**(8): e23081.
10. Brode S, West Park Healthcare Centre. Unpublished data (Toronto, Canada). 2016.
11. Brust JC, Gandhi NR, Carrara H, Osburn G, Padayatchi N. High treatment failure and default rates for patients with multidrug-resistant tuberculosis in KwaZulu-Natal, South Africa, 2000-2003. *Int J Tuberc Lung Dis* 2010; **14**(4): 413-9.
12. Cegielski JP, Kurbatova E, van der Walt M, et al. Multidrug-Resistant Tuberculosis Treatment Outcomes in Relation to Treatment and Initial Versus Acquired Second-Line Drug Resistance. *Clin Infect Dis* 2016; **62**(4): 418-30.
13. Yuen CM, Kurbatova EV, Tupasi T, et al. Association between Regimen Composition and Treatment Response in Patients with Multidrug-Resistant Tuberculosis: A Prospective Cohort Study. *PLoS medicine* 2015; **12**(12): e1001932.
14. Chan ED, National Jewish Health. Unpublished data (Denver, USA). 2016.
15. Pietersen E, Ignatius E, Streicher EM, et al. Long-term outcomes of patients with extensively drug-resistant tuberculosis in South Africa: a cohort study. *Lancet* 2014; **383**(9924): 1230-9.
16. Shean K, Streicher E, Pieterse E, et al. Drug-associated adverse events and their relationship with outcomes in patients receiving treatment for extensively drug-resistant tuberculosis in South Africa. *PLoS One* 2013; **8**(5): e63057.
17. Dheda K, Shean K, Zumla A, et al. Early treatment outcomes and HIV status of patients with extensively drug-resistant tuberculosis in South Africa: a retrospective cohort study. *Lancet* 2010; **375**(9728): 1798-807.
18. Fox G CV. Unpublished data (Sydney, Australia). 2018.

19. Gegia M, Kalandadze I, Kempker RR, Magee MJ, Blumberg HM. Adjunctive surgery improves treatment outcomes among patients with multidrug-resistant and extensively drug-resistant tuberculosis. *International journal of infectious diseases : IJID : official publication of the International Society for Infectious Diseases* 2012; **16**(5): e391-6.
20. Guglielmetti L, Jaspard M, Le Du D, et al. Long-term outcome and safety of prolonged bedaquiline treatment for multidrug-resistant tuberculosis. *Eur Respir J* 2017; **49**(3).
21. Guglielmetti L, Le Du D, Jachym M, et al. Compassionate use of bedaquiline for the treatment of multidrug-resistant and extensively drug-resistant tuberculosis: interim analysis of a French cohort. *Clin Infect Dis* 2015; **60**(2): 188-94.
22. Guglielmetti L. Unpublished data (Paris, France). 2018.
23. Hughes J, Isaakidis P, Andries A, et al. Linezolid for multidrug-resistant tuberculosis in HIV-positive and -uninfected patients. *Eur Respir J* 2015; **46**(1): 271-4.
24. Isaakidis P, Varghese B, Mansoor H, et al. Adverse events among HIV/MDR-TB co-infected patients receiving antiretroviral and second line anti-TB treatment in Mumbai, India. *PLoS One* 2012; **7**(7): e40781.
25. Jarlsberg L, Nahid P. Unpublished data (San Francisco, USA). 2016.
26. Kempker RR, Kipiani M, Mirskhulava V, Tukvadze N, Magee MJ, Blumberg HM. Acquired Drug Resistance in Mycobacterium tuberculosis and Poor Outcomes among Patients with Multidrug-Resistant Tuberculosis. *Emerg Infect Dis* 2015; **21**(6): 992-1001.
27. Charles M, Vilbrun SC, Koenig SP, et al. Treatment outcomes for patients with multidrug-resistant tuberculosis in post-earthquake Port-au-Prince, Haiti. *The American journal of tropical medicine and hygiene* 2014; **91**(4): 715-21.
28. Jeong BH, Jeon K, Park HY, et al. Outcomes of pulmonary MDR-TB: impacts of fluoroquinolone resistance and linezolid treatment. *The Journal of antimicrobial chemotherapy* 2015; **70**(11): 3127-33.
29. Koh WJ, Kang YR, Jeon K, et al. Daily 300 mg dose of linezolid for multidrug-resistant and extensively drug-resistant tuberculosis: updated analysis of 51 patients. *The Journal of antimicrobial chemotherapy* 2012; **67**(6): 1503-7.
30. Kuksa L. Unpublished data (Latvia). 2018.
31. Kvasnovsky CL, Cegielski JP, van der Walt ML. Treatment Outcomes for Patients with Extensively Drug-Resistant Tuberculosis, KwaZulu-Natal and Eastern Cape Provinces, South Africa. *Emerg Infect Dis* 2016; **22**(9).
32. Kvasnovsky CL, Cegielski JP, Erasmus R, Siwisa NO, Thomas K, der Walt ML. Extensively drug-resistant TB in Eastern Cape, South Africa: high mortality in HIV-negative and HIV-positive patients. *Journal of acquired immune deficiency syndromes (1999)* 2011; **57**(2): 146-52.
33. Eker B, Ortmann J, Migliori GB, et al. Multidrug- and extensively drug-resistant tuberculosis, Germany. *Emerg Infect Dis* 2008; **14**(11): 1700-6.
34. Laniado-Laborin R, Estrada-Guzman J, Perez H, Batiz-Armenta F, Alcantar-Schramm JM. Treatment of multidrug-resistant tuberculosis in a high-prevalence region through a binational consortium. *Int J Tuberc Lung Dis* 2012; **16**(5): 610-1.
35. Chang KC, Yew WW, Cheung SW, et al. Can intermittent dosing optimize prolonged linezolid treatment of difficult multidrug-resistant tuberculosis? *Antimicrobial agents and chemotherapy* 2013; **57**(7): 3445-9.
36. Chang KC, Leung CC, Yew WW, et al. Pyrazinamide may improve fluoroquinolone-based treatment of multidrug-resistant tuberculosis. *Antimicrobial agents and chemotherapy* 2012; **56**(11): 5465-75.

37. Marks SM, Flood J, Seaworth B, et al. Treatment practices, outcomes, and costs of multidrug-resistant and extensively drug-resistant tuberculosis, United States, 2005-2007. *Emerg Infect Dis* 2014; **20**(5): 812-21.
38. Tiberi S, Payen MC, Sotgiu G, et al. Effectiveness and safety of meropenem/clavulanate-containing regimens in the treatment of MDR- and XDR-TB. *Eur Respir J* 2016; **47**(4): 1235-43.
39. Tiberi S, Sotgiu G, D'Ambrosio L, et al. Comparison of effectiveness and safety of imipenem/clavulanate- versus meropenem/clavulanate-containing regimens in the treatment of MDR- and XDR-TB. *Eur Respir J* 2016; **47**(6): 1758-66.
40. Borisov SE, Dheda K, Enwerem M, et al. Effectiveness and safety of bedaquiline-containing regimens in the treatment of MDR- and XDR-TB: a multicentre study. *Eur Respir J* 2017; **49**(5).
41. Milanov V, Falzon D, Zamfirova M, et al. Factors associated with treatment success and death in cases with multidrug-resistant tuberculosis in Bulgaria, 2009-2010. *International journal of mycobacteriology* 2015; **4**(2): 131-7.
42. Ndjeka N, Conradie F, Schnippel K, et al. Treatment of drug-resistant tuberculosis with bedaquiline in a high HIV prevalence setting: an interim cohort analysis. *Int J Tuberc Lung Dis* 2015; **19**(8): 979-85.
43. Ndjeka N. Unpublished data (South Africa). 2018.
44. O'Donnell MR, Padayatchi N, Kvasnovsky C, Werner L, Master I, Horsburgh CR, Jr. Treatment outcomes for extensively drug-resistant tuberculosis and HIV co-infection. *Emerg Infect Dis* 2013; **19**(3): 416-24.
45. Palmero D, Gonzalez Montaner P, Cufre M, Garcia A, Vescovo M, Poggi S. First series of patients with XDR and pre-XDR TB treated with regimens that included meropenem-clavulanate in Argentina. *Archivos de bronconeumologia* 2015; **51**(10): e49-52.
46. Podewils LJ, Gler MT, Quelapio MI, Chen MP. Patterns of treatment interruption among patients with multidrug-resistant TB (MDR TB) and association with interim and final treatment outcomes. *PLoS One* 2013; **8**(7): e70064.
47. Riekstina V, Leimane V, Cirule A, Kuksa L, Latvia National TB registry. Unpublished data (Latvia). 2016.
48. Rodrigues D. Unpublished data (Brazil). 2018.
49. Seo H. Unpublished data (Seoul, South Korea). 2018.
50. Seung KJ, Franke M, Linton SW. Multidrug-Resistant Tuberculosis Treatment in North Korea: Is Scale-Up Possible? *PLoS medicine* 2016; **13**(8): e1002062.
51. Jo KW, Lee SD, Kim WS, Kim DS, Shim TS. Treatment outcomes and moxifloxacin susceptibility in ofloxacin-resistant multidrug-resistant tuberculosis. *Int J Tuberc Lung Dis* 2014; **18**(1): 39-43.
52. Singla R, Caminero JA, Jaiswal A, et al. Linezolid: an effective, safe and cheap drug for patients failing multidrug-resistant tuberculosis treatment in India. *Eur Respir J* 2012; **39**(4): 956-62.
53. Skrahina A. Unpublished data (Minsk, Belarus). 2018.
54. Smith SE, Ershova J, Vlasova N, et al. Risk factors for acquisition of drug resistance during multidrug-resistant tuberculosis treatment, Arkhangelsk Oblast, Russia, 2005-2010. *Emerg Infect Dis* 2015; **21**(6): 1002-11.
55. Diacon AH, Pym A, Grobusch MP, et al. Multidrug-resistant tuberculosis and culture conversion with bedaquiline. *N Engl J Med* 2014; **371**(8): 723-32.
56. Diacon AH, Pym A, Grobusch M, et al. The diarylquinoline TMC207 for multidrug-resistant tuberculosis. *N Engl J Med* 2009; **360**(23): 2397-405.

57. Pym AS, Diacon AH, Tang SJ, et al. Bedaquiline in the treatment of multidrug- and extensively drug-resistant tuberculosis. *Eur Respir J* 2016; **47**(2): 564-74.
58. Udwardia ZF, Sen T, Moharil G. Assessment of linezolid efficacy and safety in MDR- and XDR-TB: an Indian perspective. *Eur Respir J* 2010; **35**(4): 936-8; author reply 8-40.
59. van Altena R, de Vries G, Haar CH, et al. Highly successful treatment outcome of multidrug-resistant tuberculosis in the Netherlands, 2000-2009. *Int J Tuberc Lung Dis* 2015; **19**(4): 406-12.
60. Vasilyeva I. Unpublished data (Russia). 2018.
61. Viiklepp P, Estonian TB Registry. Unpublished data (Estonia). 2016.
62. Kwak N, Kim HR, Yoo CG, Kim YW, Han SK, Yim JJ. Changes in treatment outcomes of multidrug-resistant tuberculosis. *Int J Tuberc Lung Dis* 2015; **19**(5): 525-30.
